# Supplementary material for: Amyloid-beta peptide neurotoxicity in human neuronal cells is associated with modulation of insulin-like growth factor transport, lysosomal machinery and extracellular matrix receptor interactions
Source: PubMed Central journal article supplement — Neural Regen Res. 2020 May 11;15(11):2131–42. doi: 10.4103/1673-5374.282261 (PMC7716038; doi:10.4103/1673-5374.282261), 2020-05-11
Supplement: NRR-15-2131_Suppl2.pdf [file NRR-15-2131_Suppl2.pdf]

| Accession | Description    | Anova | Anova.adj | MaxFC | Clusters | Means.C | Means.T1 | Means.T2 | Means.T3 | Means.T4 |
|-----------|----------------|-------|-----------|-------|----------|---------|----------|----------|----------|----------|
| O00233    | 26S proteaso   | 0.02  | 0.12      | 1.39  | 1        | 1.06    | 0.86     | 0.99     | 0.76     | 0.96     |
| O00244    | Copper trans   | 0.00  | 0.01      | 1.40  | 1        | 1.11    | 0.79     | 1.03     | 0.81     | 1.11     |
| O43920    | NADH dehydi    | 0.01  | 0.08      | 1.24  | 1        | 1.05    | 0.87     | 0.97     | 0.85     | 1.04     |
| O60879    | Protein diaph  | 0.04  | 0.17      | 1.22  | 1        | 1.03    | 1.09     | 1.00     | 0.95     | 1.16     |
| O75208    | Ubiquinone b   | 0.02  | 0.11      | 1.20  | 1        | 1.04    | 0.89     | 1.01     | 0.90     | 1.06     |
| O75380    | NADH dehydi    | 0.02  | 0.12      | 1.24  | 1        | 1.01    | 0.98     | 1.08     | 0.87     | 1.05     |
| O75822    | Eukaryotic tr: | 0.00  | 0.02      | 1.31  | 1        | 1.00    | 0.92     | 1.05     | 0.86     | 1.13     |
| P06280    | Alpha-galact   | 0.00  | 0.02      | 1.23  | 1        | 1.09    | 0.89     | 0.97     | 0.89     | 1.05     |
| P07108-5  | Isoform 5 of / | 0.02  | 0.11      | 1.37  | 1        | 1.01    | 0.88     | 0.99     | 0.75     | 1.03     |
| P07602    | Prosaposin O   | 0.02  | 0.11      | 1.40  | 1        | 1.07    | 0.76     | 0.90     | 0.86     | 1.02     |
| P11441    | Ubiquitin-like | 0.02  | 0.13      | 1.25  | 1        | 1.11    | 0.89     | 0.89     | 0.90     | 0.96     |
| P13674-1  | prolyl 4-hydr  | 0.01  | 0.08      | 1.21  | 1        | 0.93    | 1.01     | 0.96     | 0.98     | 1.14     |
| P29966    | Myristoylate   | 0.02  | 0.11      | 1.52  | 1        | 1.05    | 0.77     | 1.10     | 0.80     | 1.17     |
| P35237    | Serpin B6 OS-  | 0.01  | 0.08      | 1.27  | 1        | 1.11    | 0.87     | 0.95     | 0.91     | 1.07     |
| P49006    | MARCKS-rela    | 0.02  | 0.11      | 1.53  | 1        | 1.06    | 0.83     | 1.04     | 0.85     | 1.27     |
| P60903    | Protein S100-  | 0.00  | 0.01      | 1.35  | 1        | 1.07    | 0.84     | 1.02     | 0.83     | 1.12     |
| P62857    | 40S ribosom    | 0.00  | 0.05      | 1.25  | 1        | 0.99    | 0.87     | 0.91     | 0.80     | 0.87     |
| P99999    | cytochrome c   | 0.01  | 0.06      | 1.48  | 1        | 1.17    | 0.98     | 1.09     | 0.79     | 1.03     |
| Q00688    | peptidyl-prol  | 0.01  | 0.08      | 1.31  | 1        | 1.05    | 0.94     | 1.01     | 0.86     | 1.13     |
| Q13303-3  | Isoform 3 of \ | 0.03  | 0.15      | 1.20  | 1        | 1.03    | 0.96     | 1.04     | 0.92     | 1.11     |
| Q14008    | Cytoskeleton   | 0.00  | 0.01      | 1.25  | 1        | 0.98    | 0.87     | 1.00     | 0.82     | 1.03     |
| Q15637    | Splicing facto | 0.03  | 0.14      | 1.28  | 1        | 1.09    | 0.98     | 0.96     | 0.96     | 1.22     |
| Q16773    | Kynurenine--   | 0.02  | 0.12      | 1.44  | 1        | 1.06    | 0.90     | 1.02     | 0.81     | 1.17     |
| Q5T0N5-1  | Formin-bindin  | 0.03  | 0.14      | 1.22  | 1        | 1.05    | 1.06     | 1.02     | 0.94     | 1.14     |
| Q8N983    | 39S ribosom    | 0.04  | 0.16      | 1.38  | 1        | 0.89    | 1.04     | 1.18     | 0.85     | 1.04     |
| Q8WW12    | PEST proteol   | 0.00  | 0.01      | 1.58  | 1        | 1.08    | 0.76     | 1.06     | 0.69     | 1.06     |
| Q8WY22    | BRI3-binding   | 0.01  | 0.09      | 1.27  | 1        | 1.02    | 1.07     | 0.96     | 0.84     | 1.02     |
| Q92945    | Far upstream   | 0.00  | 0.02      | 1.27  | 1        | 1.06    | 0.85     | 0.89     | 0.83     | 0.98     |
| Q96AE4    | Far upstream   | 0.02  | 0.11      | 1.47  | 1        | 1.15    | 0.81     | 0.89     | 0.78     | 0.98     |
| Q96BR5    | Cytochrome c   | 0.03  | 0.15      | 1.21  | 1        | 1.03    | 0.95     | 0.98     | 0.91     | 1.10     |
| Q99576    | TSC22 domai    | 0.00  | 0.02      | 1.51  | 1        | 1.20    | 1.01     | 0.98     | 1.04     | 1.48     |
| Q9BWS9    | Chitinase dor  | 0.00  | 0.05      | 1.24  | 1        | 0.98    | 0.87     | 1.02     | 0.88     | 1.08     |
| Q9HAV7    | GrpE protein   | 0.02  | 0.11      | 1.23  | 1        | 1.03    | 1.03     | 1.10     | 0.93     | 1.14     |
| Q9NP97    | Dynein light c | 0.00  | 0.00      | 1.33  | 1        | 1.05    | 0.86     | 0.99     | 0.81     | 1.08     |
| Q9NZ45    | CDGSH iron-s   | 0.01  | 0.07      | 1.21  | 1        | 1.06    | 1.11     | 1.10     | 1.03     | 1.25     |
| Q9P0L2-1  | Serine/threoi  | 0.02  | 0.12      | 1.32  | 1        | 1.01    | 0.89     | 1.04     | 1.00     | 1.17     |
| Q9UHR5-1  | SAP30-bindin   | 0.00  | 0.02      | 1.27  | 1        | 1.10    | 1.00     | 1.07     | 0.96     | 1.22     |
| Q9Y3E2    | BolA-like proi | 0.02  | 0.11      | 1.41  | 1        | 1.22    | 0.89     | 1.02     | 0.87     | 1.19     |
| O00273-2  | Isoform DFF3   | 0.00  | 0.01      | 1.49  | 2        | 0.91    | 1.12     | 0.86     | 1.00     | 0.75     |
| O00483    | Cytochrome c   | 0.00  | 0.02      | 1.22  | 2        | 0.98    | 0.91     | 1.05     | 0.93     | 0.86     |
| O00767    | Acyl-CoA des   | 0.01  | 0.07      | 1.25  | 2        | 0.97    | 1.13     | 0.96     | 1.12     | 0.90     |
| O15514    | DNA-directec   | 0.03  | 0.14      | 1.25  | 2        | 0.99    | 1.12     | 1.04     | 1.09     | 0.90     |
| O43818    | U3 small nucl  | 0.00  | 0.02      | 1.26  | 2        | 0.97    | 1.10     | 0.96     | 1.15     | 0.91     |
| O43933    | Peroxisome b   | 0.00  | 0.01      | 1.22  | 2        | 1.05    | 1.02     | 0.96     | 1.10     | 0.90     |
| O60216    | Double-stran   | 0.00  | 0.01      | 1.30  | 2        | 0.97    | 1.16     | 0.90     | 1.07     | 0.89     |
| O60814    | Histone H2B    | 0.00  | 0.01      | 1.44  | 2        | 0.93    | 1.24     | 0.86     | 1.24     | 0.87     |
| O75182-2  | Isoform 2 of l | 0.00  | 0.01      | 1.41  | 2        | 0.99    | 1.18     | 0.86     | 1.08     | 0.84     |
| O75367    | Core histone   | 0.03  | 0.15      | 1.29  | 2        | 0.98    | 1.10     | 0.97     | 1.18     | 0.92     |
| O95490-1  | Adhesion G p   | 0.03  | 0.14      | 1.21  | 2        | 0.98    | 1.08     | 0.92     | 1.04     | 0.89     |
| O96000    | NADH dehydi    | 0.01  | 0.08      | 1.23  | 2        | 0.94    | 1.16     | 1.02     | 1.09     | 0.96     |
| P04920-1  | Anion exchar   | 0.00  | 0.01      | 1.37  | 2        | 0.98    | 1.12     | 0.98     | 1.20     | 0.87     |
| P07910-1  | Heterogeneo    | 0.00  | 0.02      | 1.41  | 2        | 0.93    | 1.18     | 0.85     | 1.05     | 0.83     |
| P07910-2  | Isoform C1 of  | 0.00  | 0.02      | 1.29  | 2        | 0.94    | 1.03     | 0.88     | 1.06     | 0.82     |
| P08247    | Synaptophys    | 0.04  | 0.18      | 1.22  | 2        | 1.01    | 1.14     | 1.00     | 1.22     | 1.02     |
| P08670    | Vimentin [OS   | 0.00  | 0.05      | 1.22  | 2        | 0.93    | 1.08     | 0.98     | 1.14     | 0.97     |
| P09601    | heme oxygen    | 0.00  | 0.00      | 1.92  | 2        | 0.94    | 1.81     | 1.09     | 1.58     | 1.04     |
| P0C0S5    | Histone H2A.   | 0.03  | 0.15      | 1.28  | 2        | 0.90    | 1.16     | 0.95     | 1.12     | 0.90     |
| P0C0S8    | Histone H2A    | 0.03  | 0.16      | 1.64  | 2        | 0.99    | 1.44     | 0.87     | 1.34     | 0.96     |
| P23246-1  | splicing facto | 0.00  | 0.03      | 1.28  | 2        | 0.97    | 1.03     | 0.89     | 1.08     | 0.85     |
| P25912-1  | Protein max    | 0.00  | 0.03      | 1.25  | 2        | 0.95    | 1.12     | 0.97     | 1.05     | 0.89     |
| P27707    | deoxycytidine  | 0.00  | 0.02      | 1.30  | 2        | 0.95    | 1.17     | 0.90     | 1.07     | 0.91     |
| P31942    | Heterogeneo    | 0.01  | 0.06      | 1.21  | 2        | 0.97    | 1.01     | 0.90     | 1.06     | 0.87     |
| P33552    | Cyclin-depen   | 0.00  | 0.04      | 1.24  | 2        | 1.01    | 1.17     | 0.96     | 1.11     | 0.94     |
| P37268    | Squalene syn   | 0.00  | 0.00      | 1.26  | 2        | 0.97    | 1.14     | 0.99     | 1.18     | 0.93     |
| P40337    | von Hippel-Li  | 0.04  | 0.18      | 1.32  | 2        | 1.05    | 1.11     | 0.91     | 1.08     | 0.84     |
| P51610-1  | Host cell fact | 0.03  | 0.13      | 1.34  | 2        | 0.96    | 1.01     | 0.89     | 0.99     | 0.76     |
| P51991    | Heterogeneo    | 0.00  | 0.01      | 1.26  | 2        | 1.00    | 1.06     | 0.85     | 1.03     | 0.87     |
| P54725-3  | Isoform 3 of l | 0.04  | 0.17      | 1.26  | 2        | 0.97    | 0.93     | 0.91     | 0.99     | 0.78     |

|          |                 |      |      |      |   |      |      |      |      |      |
|----------|-----------------|------|------|------|---|------|------|------|------|------|
| P55268   | Laminin subu    | 0.00 | 0.03 | 1.36 | 2 | 1.00 | 1.17 | 0.88 | 1.12 | 0.86 |
| P62805   | histone H4 [C   | 0.00 | 0.01 | 1.55 | 2 | 0.90 | 1.39 | 0.92 | 1.39 | 0.94 |
| P67809   | Nuclease-sen    | 0.01 | 0.09 | 1.24 | 2 | 0.95 | 0.96 | 0.93 | 1.02 | 0.82 |
| Q00059   | Transcription   | 0.00 | 0.04 | 1.38 | 2 | 0.93 | 1.29 | 0.96 | 1.16 | 0.94 |
| Q13111-1 | Chromatin as    | 0.05 | 0.19 | 1.30 | 2 | 0.95 | 1.10 | 0.87 | 1.00 | 0.85 |
| Q13151   | Heterogeneo     | 0.00 | 0.01 | 1.23 | 2 | 0.97 | 1.11 | 0.90 | 1.08 | 0.90 |
| Q13370   | cGMP-inhibit    | 0.01 | 0.07 | 1.20 | 2 | 1.00 | 1.10 | 0.93 | 1.10 | 0.91 |
| Q13686   | DNA oxidativ    | 0.00 | 0.02 | 1.21 | 2 | 0.96 | 1.06 | 0.88 | 1.03 | 0.88 |
| Q14186   | Transcription   | 0.04 | 0.18 | 1.27 | 2 | 0.92 | 1.09 | 0.91 | 1.06 | 0.86 |
| Q14689   | Disco-interac   | 0.03 | 0.15 | 1.34 | 2 | 0.96 | 1.09 | 0.81 | 1.04 | 0.82 |
| Q15493   | Regucalcin O:   | 0.00 | 0.01 | 1.75 | 2 | 0.92 | 1.37 | 0.81 | 1.10 | 0.78 |
| Q15628   | Tumor necro:    | 0.00 | 0.03 | 1.21 | 2 | 0.96 | 1.09 | 0.93 | 1.12 | 0.94 |
| Q32MZ4-4 | Isoform 4 of I  | 0.01 | 0.07 | 1.33 | 2 | 0.91 | 1.04 | 0.87 | 1.10 | 0.83 |
| Q3B726   | DNA-directec    | 0.00 | 0.03 | 1.23 | 2 | 0.97 | 1.06 | 0.86 | 1.03 | 0.90 |
| Q5EBL8   | PDZ domain-r    | 0.01 | 0.08 | 1.32 | 2 | 0.93 | 1.12 | 0.90 | 1.06 | 0.85 |
| Q5HY17   | Metaxin-3 OS    | 0.00 | 0.00 | 1.30 | 2 | 0.95 | 1.17 | 0.97 | 1.10 | 0.90 |
| Q5JPI3   | Uncharacteri:   | 0.00 | 0.02 | 1.27 | 2 | 0.97 | 0.95 | 0.92 | 0.98 | 0.77 |
| Q5QJE6   | Deoxynucleo:    | 0.05 | 0.19 | 1.22 | 2 | 0.96 | 1.05 | 0.91 | 1.11 | 1.00 |
| Q5T447   | E3 ubiquitin-j  | 0.01 | 0.06 | 1.21 | 2 | 0.99 | 1.00 | 1.00 | 1.09 | 0.90 |
| Q6DCA0   | AMMECR1-lil     | 0.04 | 0.18 | 1.24 | 2 | 0.88 | 1.02 | 1.06 | 1.09 | 0.90 |
| Q6DKI1   | 60S ribosom:    | 0.04 | 0.17 | 1.21 | 2 | 0.91 | 1.06 | 0.91 | 1.09 | 0.94 |
| Q6NUS6   | Tectonic-3 O:   | 0.02 | 0.12 | 1.23 | 2 | 1.04 | 1.21 | 0.99 | 1.18 | 1.01 |
| Q6P4I2   | WD repeat-cr    | 0.01 | 0.07 | 1.22 | 2 | 1.02 | 1.15 | 0.94 | 1.11 | 0.98 |
| Q6PI26   | Protein SHQ1    | 0.00 | 0.05 | 1.32 | 2 | 1.00 | 1.14 | 0.86 | 1.09 | 0.93 |
| Q6SPF0   | Atherin OS=F    | 0.00 | 0.05 | 1.32 | 2 | 0.98 | 1.02 | 1.02 | 1.14 | 0.86 |
| Q71F23   | Centromere p    | 0.00 | 0.02 | 1.40 | 2 | 0.93 | 1.11 | 0.79 | 1.00 | 0.85 |
| Q7Z309   | Protein FAM:    | 0.00 | 0.02 | 1.35 | 2 | 0.92 | 1.03 | 0.89 | 0.99 | 0.76 |
| Q8IUI8   | Cytokine rece   | 0.00 | 0.01 | 1.26 | 2 | 0.98 | 1.08 | 0.89 | 1.01 | 0.85 |
| Q8IVB5   | LIX1-like prot  | 0.04 | 0.17 | 1.28 | 2 | 0.97 | 0.93 | 0.86 | 0.97 | 0.76 |
| Q8IWA0   | WD repeat-cr    | 0.00 | 0.02 | 1.22 | 2 | 0.96 | 1.13 | 0.95 | 1.16 | 1.01 |
| Q8IWL3   | Iron-sulfur cl  | 0.04 | 0.18 | 1.37 | 2 | 0.93 | 1.19 | 0.90 | 1.10 | 0.87 |
| Q8N2G8   | GH3 domain-     | 0.00 | 0.05 | 1.25 | 2 | 0.89 | 0.97 | 0.87 | 0.93 | 0.78 |
| Q8N3Z3-1 | GTP-binding j   | 0.02 | 0.10 | 1.23 | 2 | 0.92 | 0.93 | 0.91 | 0.98 | 0.79 |
| Q8N5N7   | 39S ribosom:    | 0.00 | 0.05 | 1.39 | 2 | 0.91 | 1.10 | 0.87 | 1.04 | 0.79 |
| Q8N8A6   | ATP-depende     | 0.01 | 0.07 | 1.29 | 2 | 0.98 | 1.03 | 0.87 | 1.08 | 0.84 |
| Q8NFG4   | Folliculin OS=  | 0.00 | 0.02 | 1.30 | 2 | 1.04 | 1.15 | 0.94 | 1.12 | 0.88 |
| Q8TED0   | U3 small nucl   | 0.03 | 0.14 | 1.21 | 2 | 0.97 | 1.09 | 0.93 | 1.12 | 0.99 |
| Q8WU76-1 | Sec1 family d   | 0.03 | 0.15 | 1.42 | 2 | 0.86 | 0.91 | 0.83 | 1.05 | 0.74 |
| Q8WVB6   | Chromosome      | 0.00 | 0.01 | 1.45 | 2 | 1.02 | 1.17 | 0.81 | 1.04 | 0.82 |
| Q92673   | Sortilin-relate | 0.00 | 0.05 | 1.30 | 2 | 0.88 | 1.12 | 1.01 | 1.05 | 0.87 |
| Q969X6   | U3 small nucl   | 0.04 | 0.18 | 1.21 | 2 | 0.91 | 1.04 | 0.96 | 1.11 | 1.02 |
| Q96D15   | Reticulocalbi   | 0.00 | 0.00 | 2.02 | 2 | 1.00 | 1.45 | 0.76 | 1.09 | 0.72 |
| Q96FX8   | p53 apoptosi    | 0.01 | 0.08 | 1.33 | 2 | 0.97 | 0.99 | 0.98 | 1.02 | 0.77 |
| Q96G21   | U3 small nucl   | 0.01 | 0.06 | 1.21 | 2 | 0.95 | 1.01 | 0.93 | 1.02 | 0.85 |
| Q96JA3   | Pleckstrin hor  | 0.00 | 0.02 | 1.43 | 2 | 1.18 | 1.09 | 0.89 | 1.27 | 0.99 |
| Q96ME7   | Zinc finger pr  | 0.01 | 0.09 | 1.24 | 2 | 0.98 | 0.96 | 0.85 | 1.05 | 0.84 |
| Q96T23   | remodeling a    | 0.05 | 0.18 | 1.23 | 2 | 0.91 | 1.07 | 1.07 | 1.11 | 0.98 |
| Q99666   | RANBP2-like     | 0.00 | 0.00 | 1.38 | 2 | 0.98 | 1.18 | 0.95 | 1.14 | 0.86 |
| Q9BRA2   | Thioredoxin c   | 0.01 | 0.09 | 1.21 | 2 | 1.06 | 1.00 | 1.03 | 1.01 | 0.88 |
| Q9BRU9   | rRNA-process    | 0.03 | 0.14 | 1.34 | 2 | 0.94 | 1.00 | 0.97 | 1.07 | 0.80 |
| Q9BU64-1 | centromere p    | 0.00 | 0.02 | 1.21 | 2 | 1.10 | 1.14 | 0.95 | 1.14 | 0.95 |
| Q9BUR4   | Telomerase C    | 0.00 | 0.05 | 1.23 | 2 | 0.94 | 1.05 | 0.93 | 1.03 | 0.86 |
| Q9BV73-1 | Centrosome-     | 0.00 | 0.02 | 1.30 | 2 | 0.98 | 1.17 | 0.97 | 1.13 | 0.90 |
| Q9BVI4   | Nucleolar cor   | 0.00 | 0.01 | 1.24 | 2 | 0.97 | 1.03 | 0.91 | 1.09 | 0.88 |
| Q9BX70   | BTB/POZ don     | 0.03 | 0.16 | 1.29 | 2 | 1.08 | 1.00 | 1.12 | 1.15 | 0.89 |
| Q9BY12   | S phase cyclin  | 0.03 | 0.16 | 1.47 | 2 | 0.63 | 0.93 | 0.86 | 0.81 | 0.68 |
| Q9BZX2   | Uridine-cytid   | 0.00 | 0.00 | 1.26 | 2 | 0.99 | 1.08 | 0.94 | 1.09 | 0.87 |
| Q9H0H0   | integrator co   | 0.00 | 0.02 | 1.24 | 2 | 0.91 | 0.99 | 0.93 | 0.93 | 0.80 |
| Q9H8M2   | Bromodomai      | 0.01 | 0.06 | 1.64 | 2 | 0.80 | 1.19 | 0.75 | 1.15 | 0.72 |
| Q9H981   | Actin-related   | 0.00 | 0.03 | 1.21 | 2 | 1.07 | 1.15 | 0.97 | 1.13 | 0.95 |
| Q9H9Q4-1 | non-homolog     | 0.00 | 0.01 | 1.26 | 2 | 0.98 | 1.21 | 0.96 | 1.08 | 0.96 |
| Q9HB09   | Bcl-2-like pro  | 0.03 | 0.16 | 1.30 | 2 | 1.04 | 1.30 | 1.04 | 1.35 | 1.05 |
| Q9HC52   | Chromobox p     | 0.00 | 0.03 | 1.28 | 2 | 0.94 | 1.06 | 0.86 | 1.03 | 0.83 |
| Q9NNX1   | Tuftelin OS=F   | 0.00 | 0.03 | 1.54 | 2 | 0.96 | 1.09 | 0.92 | 1.16 | 0.76 |
| Q9NP66   | High mobility   | 0.04 | 0.18 | 1.39 | 2 | 1.00 | 1.01 | 0.87 | 1.13 | 0.81 |
| Q9NQX7   | Integral mem    | 0.01 | 0.07 | 1.44 | 2 | 0.78 | 1.12 | 0.87 | 1.10 | 0.82 |
| Q9NSI2   | Protein FAM:    | 0.00 | 0.00 | 1.22 | 2 | 0.96 | 1.04 | 0.93 | 1.06 | 0.86 |
| Q9NV31   | U3 small nucl   | 0.00 | 0.04 | 1.23 | 2 | 0.93 | 1.11 | 0.93 | 1.10 | 0.90 |
| Q9NV92   | NEDD4 famil     | 0.00 | 0.00 | 1.39 | 2 | 0.99 | 1.17 | 0.95 | 1.24 | 0.89 |

|          |                |      |      |      |   |      |      |      |      |      |
|----------|----------------|------|------|------|---|------|------|------|------|------|
| Q9NVK5-1 | FGFR1 oncog    | 0.00 | 0.04 | 1.32 | 2 | 1.00 | 1.07 | 0.86 | 1.04 | 0.81 |
| Q9NWT1   | p21-activatec  | 0.00 | 0.01 | 1.32 | 2 | 0.98 | 1.14 | 0.91 | 1.07 | 0.86 |
| Q9NZM5   | Glioma tumo    | 0.05 | 0.19 | 1.31 | 2 | 0.91 | 0.96 | 0.92 | 1.10 | 0.84 |
| Q9P0M9   | 39S ribosoma   | 0.00 | 0.04 | 1.31 | 2 | 0.99 | 0.95 | 0.95 | 0.92 | 0.76 |
| Q9P2X0   | Dolichol-pho   | 0.00 | 0.03 | 1.27 | 2 | 0.96 | 1.01 | 0.93 | 0.98 | 0.80 |
| Q9UBN7-1 | histone deac   | 0.03 | 0.14 | 1.20 | 2 | 1.05 | 1.12 | 0.98 | 1.13 | 0.94 |
| Q9UGP4   | LIM domain-t   | 0.03 | 0.14 | 1.21 | 2 | 1.02 | 1.05 | 0.97 | 1.04 | 0.87 |
| Q9UHA3   | Probable ribc  | 0.04 | 0.18 | 1.35 | 2 | 0.97 | 1.05 | 0.90 | 1.19 | 0.88 |
| Q9UI30   | Multifunctior  | 0.00 | 0.01 | 1.27 | 2 | 0.99 | 1.09 | 0.95 | 1.05 | 0.85 |
| Q9UKD1   | Glucocorticoi  | 0.00 | 0.02 | 1.32 | 2 | 1.04 | 1.06 | 1.05 | 1.16 | 0.87 |
| Q9ULJ7   | Ankyrin repe   | 0.03 | 0.15 | 1.21 | 2 | 0.98 | 1.08 | 0.93 | 1.12 | 0.97 |
| Q9UNK0   | Syntaxin-8 O   | 0.02 | 0.12 | 1.22 | 2 | 1.02 | 1.06 | 0.93 | 1.02 | 0.87 |
| Q9UQ13   | Leucine-rich   | 0.01 | 0.08 | 1.27 | 2 | 0.88 | 0.95 | 0.91 | 0.93 | 0.74 |
| Q9Y2C4   | Nuclease EXC   | 0.00 | 0.00 | 1.37 | 2 | 0.92 | 1.11 | 0.93 | 1.03 | 0.81 |
| Q9Y3B1   | PRELI domair   | 0.02 | 0.10 | 1.92 | 2 | 0.94 | 1.40 | 0.88 | 1.10 | 0.73 |
| Q9Y3T6   | R3H and coile  | 0.03 | 0.15 | 1.23 | 2 | 1.08 | 1.02 | 1.06 | 1.18 | 0.96 |
| O14618   | copper chape   | 0.00 | 0.00 | 1.24 | 3 | 1.01 | 0.91 | 1.13 | 0.96 | 1.03 |
| O14647   | Chromodom      | 0.03 | 0.13 | 1.29 | 3 | 1.02 | 0.79 | 1.01 | 0.88 | 0.97 |
| O14957   | cytochrome k   | 0.01 | 0.06 | 1.34 | 3 | 0.89 | 0.95 | 1.19 | 0.92 | 1.08 |
| O15063   | Uncharacteri   | 0.05 | 0.19 | 1.21 | 3 | 0.97 | 0.96 | 1.11 | 1.03 | 1.16 |
| O15126-1 | Secretory car  | 0.00 | 0.01 | 1.21 | 3 | 1.01 | 0.95 | 1.12 | 0.93 | 1.14 |
| O15382   | Branched-ch    | 0.00 | 0.01 | 1.21 | 3 | 0.99 | 0.89 | 1.07 | 0.89 | 1.02 |
| O43633   | Charged mult   | 0.00 | 0.00 | 1.25 | 3 | 1.00 | 0.87 | 1.02 | 0.88 | 1.09 |
| O43708   | maleylaceto    | 0.00 | 0.00 | 1.39 | 3 | 1.01 | 0.87 | 1.21 | 0.90 | 1.20 |
| O43759-2 | Isoform 1B of  | 0.00 | 0.02 | 1.23 | 3 | 0.98 | 0.86 | 1.06 | 0.93 | 1.00 |
| O43826-1 | Glucose-6-ph   | 0.01 | 0.06 | 1.27 | 3 | 0.95 | 0.84 | 1.06 | 0.92 | 1.00 |
| O43852-4 | Isoform 4 of   | 0.00 | 0.00 | 1.71 | 3 | 1.07 | 0.94 | 1.30 | 0.99 | 1.61 |
| O60573   | Eukaryotic tr  | 0.01 | 0.07 | 1.24 | 3 | 0.99 | 0.96 | 1.12 | 0.91 | 1.11 |
| O60890   | Oligophrenin   | 0.00 | 0.02 | 1.36 | 3 | 1.03 | 0.84 | 1.05 | 0.88 | 1.15 |
| O75391   | Sperm-associ   | 0.00 | 0.01 | 1.26 | 3 | 1.00 | 0.86 | 1.04 | 0.91 | 1.08 |
| O94811   | Tubulin polyr  | 0.00 | 0.03 | 1.21 | 3 | 1.06 | 0.88 | 0.99 | 0.91 | 0.98 |
| O95218   | Zinc finger R  | 0.00 | 0.01 | 1.36 | 3 | 1.01 | 0.89 | 1.10 | 0.95 | 1.22 |
| O95716   | ras-related p  | 0.00 | 0.02 | 1.26 | 3 | 1.02 | 0.97 | 1.09 | 0.92 | 1.16 |
| O96033   | Molybdopter    | 0.02 | 0.11 | 1.21 | 3 | 1.05 | 0.93 | 1.05 | 1.00 | 1.13 |
| P00505   | Aspartate am   | 0.05 | 0.19 | 1.22 | 3 | 1.05 | 0.90 | 1.11 | 0.91 | 1.02 |
| P01116   | GTPase KRas    | 0.03 | 0.14 | 1.28 | 3 | 1.04 | 0.86 | 1.10 | 0.97 | 1.07 |
| P04080   | Cystatin-B [O  | 0.01 | 0.07 | 1.36 | 3 | 1.00 | 0.79 | 0.97 | 0.85 | 1.07 |
| P05166   | Propionyl-Co   | 0.00 | 0.01 | 1.20 | 3 | 0.99 | 0.89 | 1.06 | 0.91 | 1.03 |
| P07311   | Acylphosphai   | 0.00 | 0.02 | 1.59 | 3 | 1.00 | 0.64 | 1.02 | 0.77 | 0.98 |
| P07339   | Cathepsin D [  | 0.02 | 0.11 | 1.27 | 3 | 1.04 | 0.82 | 0.98 | 0.95 | 0.99 |
| P07858   | Cathepsin B C  | 0.00 | 0.02 | 1.28 | 3 | 1.09 | 0.85 | 1.05 | 0.91 | 1.09 |
| P08648   | Integrin alph  | 0.01 | 0.09 | 1.23 | 3 | 1.02 | 0.88 | 1.08 | 0.95 | 1.04 |
| P08962   | CD63 antigen   | 0.00 | 0.02 | 1.23 | 3 | 0.94 | 0.79 | 0.97 | 0.89 | 0.90 |
| P09488   | Glutathione S  | 0.04 | 0.17 | 1.27 | 3 | 1.12 | 0.89 | 1.09 | 0.99 | 1.13 |
| P10109   | Adrenodoxin    | 0.01 | 0.08 | 1.22 | 3 | 1.04 | 0.86 | 1.05 | 1.00 | 1.00 |
| P10599   | Thioredoxin C  | 0.00 | 0.01 | 1.60 | 3 | 1.00 | 0.62 | 0.95 | 0.84 | 0.92 |
| P11234   | Ras-related p  | 0.00 | 0.05 | 1.33 | 3 | 1.03 | 0.96 | 1.22 | 0.99 | 1.27 |
| P13473   | Lysosome-as    | 0.01 | 0.08 | 1.38 | 3 | 1.15 | 0.85 | 1.17 | 0.95 | 1.17 |
| P13640   | metallothion   | 0.01 | 0.06 | 4.72 | 3 | 1.45 | 0.31 | 0.86 | 0.53 | 0.93 |
| P15154-1 | Ras-related C  | 0.00 | 0.04 | 1.23 | 3 | 1.04 | 0.93 | 1.15 | 0.97 | 1.12 |
| P17900   | Ganglioside C  | 0.01 | 0.09 | 1.73 | 3 | 1.19 | 0.69 | 0.91 | 0.80 | 1.01 |
| P21397   | Amine oxidas   | 0.00 | 0.02 | 1.21 | 3 | 0.98 | 0.92 | 1.00 | 1.00 | 1.10 |
| P26583   | High mobility  | 0.01 | 0.07 | 1.46 | 3 | 0.99 | 0.67 | 0.92 | 0.71 | 0.95 |
| P29218   | Inositol monc  | 0.01 | 0.08 | 1.26 | 3 | 1.05 | 0.85 | 1.05 | 0.92 | 1.07 |
| P29373   | Cellular retin | 0.00 | 0.00 | 1.26 | 3 | 1.02 | 0.84 | 1.07 | 0.88 | 1.04 |
| P30086   | Phosphatidyl   | 0.01 | 0.07 | 1.28 | 3 | 1.02 | 0.81 | 1.02 | 0.93 | 1.03 |
| P30740   | Leukocyte ele  | 0.00 | 0.04 | 1.46 | 3 | 1.07 | 0.79 | 0.93 | 0.90 | 1.15 |
| P31949   | protein S100-  | 0.03 | 0.15 | 1.22 | 3 | 0.96 | 0.90 | 1.11 | 0.93 | 1.06 |
| P32322   | Pyrraline-5-c  | 0.00 | 0.01 | 1.20 | 3 | 0.99 | 0.84 | 1.01 | 0.87 | 0.93 |
| P35580   | Myosin-10 O    | 0.00 | 0.02 | 1.24 | 3 | 0.99 | 0.80 | 0.95 | 0.82 | 0.95 |
| P35754   | Glutaredoxin   | 0.02 | 0.11 | 1.29 | 3 | 1.12 | 0.90 | 1.11 | 0.97 | 1.17 |
| P35813   | Protein phosj  | 0.00 | 0.01 | 1.22 | 3 | 1.01 | 0.85 | 1.02 | 0.93 | 1.04 |
| P37235   | Hippocalcin-l  | 0.00 | 0.05 | 1.94 | 3 | 1.09 | 0.56 | 0.93 | 0.81 | 0.88 |
| P40121   | Macrophage-    | 0.02 | 0.10 | 1.21 | 3 | 1.02 | 0.98 | 1.12 | 1.02 | 1.19 |
| P41236   | Protein phosj  | 0.02 | 0.13 | 1.25 | 3 | 1.02 | 0.90 | 1.13 | 0.96 | 1.08 |
| P42025   | Beta-centract  | 0.02 | 0.11 | 1.20 | 3 | 1.00 | 0.92 | 1.09 | 0.96 | 1.10 |
| P48509   | CD151 antige   | 0.02 | 0.12 | 1.35 | 3 | 1.14 | 0.86 | 1.12 | 0.85 | 1.09 |
| P49366   | Deoxyhypusii   | 0.01 | 0.07 | 1.20 | 3 | 1.04 | 0.93 | 1.08 | 0.90 | 1.04 |
| P51149   | Ras-related p  | 0.02 | 0.11 | 1.26 | 3 | 1.01 | 0.90 | 1.11 | 0.88 | 1.03 |

|          |                           |      |      |      |   |      |      |      |      |      |
|----------|---------------------------|------|------|------|---|------|------|------|------|------|
| P53985   | Monocarboxylate           | 0.00 | 0.01 | 1.36 | 3 | 1.00 | 0.93 | 1.17 | 0.98 | 1.26 |
| P54252   | Ataxin-3 OS=              | 0.00 | 0.00 | 1.22 | 3 | 1.02 | 0.88 | 1.05 | 0.92 | 1.07 |
| P55263   | Adenosine kinase          | 0.01 | 0.10 | 1.20 | 3 | 0.99 | 0.94 | 1.13 | 0.99 | 1.04 |
| P60059   | Protein translocator      | 0.00 | 0.03 | 1.30 | 3 | 1.01 | 0.89 | 1.15 | 1.01 | 1.08 |
| P60520   | Gamma-aminobutyrate       | 0.00 | 0.02 | 1.22 | 3 | 1.02 | 0.91 | 1.06 | 0.98 | 1.11 |
| P61026   | ras-related protein       | 0.00 | 0.01 | 1.20 | 3 | 1.01 | 0.89 | 1.07 | 0.91 | 1.07 |
| P61803   | Dolichyl-diphosphate      | 0.00 | 0.04 | 1.27 | 3 | 1.09 | 0.86 | 1.09 | 1.01 | 1.02 |
| P61916   | NPC intracellular         | 0.04 | 0.16 | 1.98 | 3 | 1.22 | 0.62 | 0.97 | 0.79 | 0.97 |
| P61927   | 60S ribosomal protein     | 0.05 | 0.18 | 1.23 | 3 | 1.01 | 0.82 | 1.00 | 0.96 | 0.98 |
| P61956   | small ubiquitin-like      | 0.00 | 0.02 | 1.32 | 3 | 1.11 | 0.90 | 1.07 | 0.96 | 1.19 |
| P62745   | Rho-related GTPase        | 0.04 | 0.18 | 1.31 | 3 | 1.15 | 0.88 | 1.04 | 0.94 | 1.04 |
| P62820   | Ras-related protein       | 0.00 | 0.03 | 1.21 | 3 | 1.03 | 0.97 | 1.11 | 0.98 | 1.17 |
| P62834   | ras-related protein       | 0.00 | 0.02 | 1.60 | 3 | 1.08 | 0.82 | 1.25 | 0.79 | 1.26 |
| P68402   | Platelet-activating       | 0.03 | 0.15 | 1.29 | 3 | 1.07 | 0.99 | 1.22 | 1.01 | 1.28 |
| P83876   | thioredoxin-like          | 0.00 | 0.03 | 1.24 | 3 | 1.03 | 0.87 | 1.07 | 0.96 | 1.04 |
| Q01469   | Fatty acid-binding        | 0.02 | 0.11 | 1.26 | 3 | 0.97 | 0.94 | 1.19 | 0.98 | 1.12 |
| Q04760   | Lactoylglutathione        | 0.01 | 0.06 | 1.21 | 3 | 1.03 | 0.86 | 1.04 | 0.93 | 0.99 |
| Q08722   | Leukocyte surface         | 0.00 | 0.00 | 1.24 | 3 | 1.06 | 0.93 | 1.11 | 0.94 | 1.15 |
| Q13011   | Delta(3,5)-Desaturase     | 0.00 | 0.02 | 1.27 | 3 | 1.02 | 0.81 | 1.02 | 0.91 | 0.95 |
| Q13123   | Protein Red [             | 0.04 | 0.16 | 1.20 | 3 | 0.97 | 0.90 | 1.01 | 0.97 | 1.08 |
| Q13162   | Peroxiredoxin             | 0.00 | 0.04 | 1.50 | 3 | 1.10 | 0.74 | 0.93 | 0.85 | 0.99 |
| Q13491-4 | Isoform 4 of              | 0.01 | 0.10 | 1.23 | 3 | 1.02 | 0.88 | 1.08 | 0.89 | 1.01 |
| Q13510   | Acid ceramidase           | 0.00 | 0.03 | 1.26 | 3 | 1.01 | 0.83 | 1.02 | 0.94 | 1.05 |
| Q13795   | ADP-ribosyltransferase    | 0.01 | 0.06 | 1.24 | 3 | 0.98 | 0.90 | 1.05 | 0.94 | 1.12 |
| Q15181   | Inorganic pyrophosphatase | 0.00 | 0.01 | 1.41 | 3 | 1.02 | 0.73 | 1.02 | 0.93 | 0.98 |
| Q15208   | Serine/threonine kinase   | 0.01 | 0.10 | 1.21 | 3 | 1.06 | 1.01 | 1.12 | 1.04 | 1.22 |
| Q15274   | nicotinate-nucleotide     | 0.00 | 0.00 | 1.40 | 3 | 1.02 | 0.79 | 1.10 | 0.83 | 1.04 |
| Q16637   | Survival motor neuron     | 0.00 | 0.01 | 1.20 | 3 | 1.00 | 0.91 | 1.08 | 0.96 | 1.10 |
| Q3ZAQ7   | Vacuolar ATPase           | 0.00 | 0.04 | 1.43 | 3 | 1.12 | 0.78 | 0.97 | 0.88 | 1.03 |
| Q4VCS5   | Angiomotin C              | 0.00 | 0.01 | 1.24 | 3 | 0.94 | 0.84 | 1.04 | 0.87 | 0.95 |
| Q53EL6   | Programmed cell death     | 0.00 | 0.00 | 1.26 | 3 | 1.01 | 0.84 | 1.06 | 0.84 | 1.01 |
| Q5T2R2   | Decaprenyl-diphosphate    | 0.03 | 0.14 | 2.08 | 3 | 1.14 | 0.60 | 1.24 | 0.97 | 1.06 |
| Q6FIF0   | AN1-type zinc finger      | 0.03 | 0.15 | 1.21 | 3 | 1.09 | 0.90 | 1.07 | 0.94 | 1.04 |
| Q6JQN1   | Acyl-CoA dehydrogenase    | 0.03 | 0.14 | 1.36 | 3 | 0.96 | 0.79 | 1.08 | 0.99 | 1.03 |
| Q6P1N0   | Coiled-coil domain        | 0.03 | 0.15 | 1.26 | 3 | 0.95 | 0.83 | 1.00 | 0.89 | 1.05 |
| Q6P587-1 | Acylpyruvase              | 0.01 | 0.10 | 1.29 | 3 | 1.02 | 0.79 | 1.01 | 0.89 | 1.02 |
| Q6PI78   | Transmembrane protein     | 0.00 | 0.02 | 1.26 | 3 | 0.98 | 0.92 | 1.08 | 1.01 | 1.16 |
| Q6PID6   | Tetratricopeptide         | 0.00 | 0.03 | 1.22 | 3 | 1.03 | 0.99 | 1.10 | 0.98 | 1.20 |
| Q6UB99   | Ankyrin repeat            | 0.03 | 0.15 | 1.30 | 3 | 0.90 | 0.95 | 1.07 | 0.97 | 1.17 |
| Q6UW68   | Transmembrane protein     | 0.00 | 0.03 | 1.27 | 3 | 1.04 | 0.89 | 1.12 | 0.97 | 1.13 |
| Q6UXH1-5 | Isoform 5 of              | 0.02 | 0.12 | 1.30 | 3 | 1.03 | 0.84 | 1.05 | 0.94 | 1.09 |
| Q7L592   | NADH dehydrogenase        | 0.00 | 0.00 | 1.24 | 3 | 0.99 | 0.85 | 1.05 | 0.88 | 1.01 |
| Q7Z4V5   | Hepatoma-derived          | 0.01 | 0.08 | 1.32 | 3 | 1.04 | 0.98 | 1.29 | 1.02 | 1.21 |
| Q86V88   | Magnesium-activated       | 0.03 | 0.14 | 1.27 | 3 | 1.03 | 0.94 | 1.19 | 0.97 | 1.09 |
| Q86VM9   | Zinc finger CCHC          | 0.00 | 0.03 | 1.38 | 3 | 0.93 | 0.86 | 1.18 | 0.86 | 1.06 |
| Q86WA6   | Valacyclovir              | 0.01 | 0.05 | 1.24 | 3 | 1.03 | 0.85 | 1.00 | 0.88 | 1.04 |
| Q8IWB9   | Testis-expressed          | 0.02 | 0.13 | 1.21 | 3 | 1.01 | 0.88 | 1.02 | 0.92 | 1.07 |
| Q8IYS1   | Peptidase M20             | 0.00 | 0.02 | 1.26 | 3 | 0.94 | 0.89 | 1.12 | 0.92 | 1.00 |
| Q8N1G0   | Zinc finger protein       | 0.04 | 0.18 | 1.22 | 3 | 0.98 | 0.86 | 1.03 | 0.91 | 1.05 |
| Q8N2U0   | Transmembrane protein     | 0.00 | 0.04 | 1.36 | 3 | 0.97 | 0.83 | 1.13 | 0.93 | 1.10 |
| Q8ND24   | RING finger protein       | 0.00 | 0.02 | 1.20 | 3 | 1.02 | 0.89 | 1.03 | 0.95 | 1.07 |
| Q8NHP8   | Putative phosphatase      | 0.01 | 0.07 | 1.21 | 3 | 1.08 | 0.90 | 0.98 | 0.92 | 1.07 |
| Q8NI22   | Multiple coiled-coil      | 0.01 | 0.06 | 1.42 | 3 | 0.93 | 0.89 | 1.27 | 0.99 | 1.26 |
| Q8TBP6   | Solute carrier            | 0.00 | 0.03 | 1.30 | 3 | 1.10 | 0.85 | 1.03 | 1.02 | 1.03 |
| Q8TEA8   | D-tyrosyl-tRNA            | 0.00 | 0.03 | 1.58 | 3 | 1.07 | 0.68 | 1.04 | 0.91 | 0.94 |
| Q8WYN0   | Cysteine protease         | 0.01 | 0.06 | 1.39 | 3 | 0.96 | 0.88 | 1.22 | 0.94 | 1.12 |
| Q92551   | Inositol hexakisphosphate | 0.03 | 0.13 | 1.24 | 3 | 1.04 | 0.91 | 1.09 | 0.98 | 1.13 |
| Q92820   | Gamma-glutamyl            | 0.00 | 0.00 | 1.28 | 3 | 1.00 | 0.85 | 1.08 | 0.89 | 1.06 |
| Q96A54   | Adiponectin receptor      | 0.03 | 0.14 | 1.28 | 3 | 0.94 | 0.89 | 1.15 | 0.95 | 1.14 |
| Q96AT9   | Ribulose-phosphate        | 0.00 | 0.05 | 1.35 | 3 | 1.09 | 0.80 | 1.03 | 0.86 | 0.98 |
| Q96BM9   | ADP-ribosyltransferase    | 0.02 | 0.11 | 1.30 | 3 | 1.03 | 1.07 | 1.24 | 0.97 | 1.26 |
| Q96C19   | EF-hand domain            | 0.00 | 0.01 | 1.27 | 3 | 0.97 | 0.88 | 1.12 | 0.95 | 1.06 |
| Q96C36   | Pyrrroline-5-carboxylate  | 0.00 | 0.01 | 1.22 | 3 | 0.98 | 0.86 | 1.05 | 0.87 | 0.98 |
| Q96CW6   | Probable RNA polymerase   | 0.01 | 0.06 | 1.22 | 3 | 1.06 | 0.87 | 1.01 | 0.95 | 0.95 |
| Q96DA6   | mitochondrial             | 0.00 | 0.03 | 1.25 | 3 | 0.94 | 0.87 | 1.09 | 0.95 | 1.01 |
| Q96DP5   | Methionyl-tRNA            | 0.00 | 0.05 | 1.29 | 3 | 1.04 | 0.82 | 1.04 | 0.88 | 1.05 |
| Q96MW1   | Coiled-coil domain        | 0.00 | 0.01 | 1.21 | 3 | 1.06 | 0.94 | 1.04 | 1.02 | 1.14 |
| Q99442   | Translocator              | 0.01 | 0.08 | 1.24 | 3 | 1.02 | 0.92 | 1.06 | 0.92 | 1.14 |
| Q99576-3 | Isoform 2 of              | 0.00 | 0.03 | 1.23 | 3 | 1.03 | 0.88 | 1.09 | 0.94 | 1.09 |

|          |                |      |      |      |   |      |      |      |      |      |
|----------|----------------|------|------|------|---|------|------|------|------|------|
| Q99807-1 | 5-demethoxy    | 0.00 | 0.01 | 1.39 | 3 | 1.04 | 0.92 | 1.11 | 0.92 | 1.28 |
| Q99816   | Tumor suscep   | 0.00 | 0.00 | 1.20 | 3 | 1.01 | 0.90 | 1.08 | 0.92 | 1.08 |
| Q99829   | Copine-1 OS=   | 0.00 | 0.02 | 1.25 | 3 | 1.03 | 0.90 | 1.10 | 0.93 | 1.13 |
| Q99856   | AT-rich interc | 0.00 | 0.04 | 1.23 | 3 | 1.05 | 0.93 | 1.12 | 0.95 | 1.15 |
| Q9BUE0   | Mediator of f  | 0.00 | 0.01 | 1.43 | 3 | 1.01 | 0.92 | 1.27 | 0.94 | 1.31 |
| Q9BUL8   | programmed     | 0.00 | 0.02 | 1.23 | 3 | 0.98 | 0.88 | 1.08 | 0.89 | 1.03 |
| Q9BV79   | Enoyl-[acyl-ci | 0.00 | 0.01 | 1.28 | 3 | 0.99 | 0.88 | 1.13 | 0.92 | 1.09 |
| Q9BWH2   | FUN14 doma     | 0.00 | 0.02 | 1.21 | 3 | 1.09 | 0.99 | 1.20 | 1.00 | 1.17 |
| Q9GZT9-1 | Egl nine hom   | 0.00 | 0.03 | 1.28 | 3 | 1.02 | 0.80 | 0.96 | 0.88 | 1.03 |
| Q9H063   | repressor of f | 0.00 | 0.04 | 1.20 | 3 | 1.00 | 0.92 | 1.09 | 1.05 | 1.10 |
| Q9H0W9   | Ester hydroly  | 0.00 | 0.00 | 1.60 | 3 | 1.10 | 0.72 | 1.14 | 0.91 | 1.12 |
| Q9H3K2   | Growth horrr   | 0.00 | 0.03 | 1.30 | 3 | 1.09 | 0.84 | 1.06 | 0.91 | 0.98 |
| Q9H5H4   | Zinc finger pr | 0.00 | 0.01 | 1.24 | 3 | 1.01 | 0.82 | 0.99 | 0.87 | 0.98 |
| Q9H6K1   | Uncharacteri   | 0.04 | 0.17 | 1.27 | 3 | 0.76 | 0.75 | 0.89 | 0.95 | 0.86 |
| Q9H7C9-1 | Mth938 dom     | 0.00 | 0.01 | 1.29 | 3 | 1.06 | 0.89 | 1.15 | 0.96 | 1.13 |
| Q9H920   | RING finger p  | 0.02 | 0.12 | 1.42 | 3 | 0.79 | 0.85 | 1.12 | 1.02 | 1.01 |
| Q9HBK9   | Arsenite met   | 0.00 | 0.02 | 1.34 | 3 | 1.02 | 0.85 | 1.14 | 0.96 | 1.10 |
| Q9NPJ3   | Acyl-coenzym   | 0.00 | 0.01 | 1.29 | 3 | 0.97 | 0.86 | 1.08 | 0.91 | 1.10 |
| Q9NUD5   | Zinc finger CC | 0.00 | 0.05 | 1.30 | 3 | 1.08 | 0.83 | 0.93 | 0.92 | 0.94 |
| Q9NVE7   | pantothenate   | 0.00 | 0.00 | 1.20 | 3 | 1.03 | 0.87 | 1.01 | 0.92 | 1.05 |
| Q9NVJ2   | ADP-ribosylat  | 0.03 | 0.16 | 1.22 | 3 | 1.01 | 0.92 | 1.13 | 0.94 | 1.10 |
| Q9NZU5   | LIM and cyste  | 0.00 | 0.03 | 1.20 | 3 | 0.95 | 0.86 | 1.03 | 0.89 | 0.99 |
| Q9P2K2   | Thioredoxin c  | 0.05 | 0.19 | 1.28 | 3 | 0.95 | 0.92 | 0.97 | 0.85 | 1.09 |
| Q9UBI6   | Guanine nucl   | 0.03 | 0.15 | 1.26 | 3 | 0.90 | 0.98 | 1.13 | 0.91 | 1.09 |
| Q9UEG4   | Zinc finger pr | 0.05 | 0.19 | 1.23 | 3 | 1.06 | 0.86 | 0.94 | 0.89 | 1.06 |
| Q9UKJ3-1 | G patch dom    | 0.04 | 0.16 | 1.21 | 3 | 0.98 | 0.88 | 1.06 | 0.95 | 1.04 |
| Q9Y232-1 | Chromodom      | 0.00 | 0.01 | 1.57 | 3 | 1.08 | 0.84 | 1.22 | 0.90 | 1.32 |
| Q9Y2Q3-1 | Glutathione S  | 0.00 | 0.03 | 1.21 | 3 | 0.96 | 1.03 | 1.14 | 1.03 | 1.16 |
| Q9Y3D6   | Mitochondria   | 0.00 | 0.00 | 1.25 | 3 | 0.96 | 0.90 | 1.12 | 0.98 | 1.00 |
| Q9Y467   | sal-like prote | 0.00 | 0.04 | 1.22 | 3 | 1.12 | 0.92 | 1.06 | 0.99 | 1.06 |
| Q9Y4E5   | E3 SUMO-prc    | 0.02 | 0.13 | 1.26 | 3 | 1.03 | 0.86 | 1.08 | 0.92 | 1.09 |
| Q9Y6B6   | GTP-binding j  | 0.00 | 0.01 | 1.22 | 3 | 0.99 | 0.86 | 1.04 | 0.90 | 1.03 |
| O14657   | Torsin-1B [O   | 0.03 | 0.15 | 1.36 | 4 | 1.11 | 1.43 | 1.05 | 1.26 | 1.26 |
| O15392   | Baculoviral IA | 0.05 | 0.18 | 1.27 | 4 | 1.08 | 1.25 | 1.03 | 1.07 | 0.98 |
| O43164   | E3 ubiquitin-j | 0.00 | 0.02 | 1.27 | 4 | 0.97 | 1.10 | 0.87 | 1.04 | 0.92 |
| O43174   | Cytochrome l   | 0.00 | 0.01 | 1.27 | 4 | 1.02 | 1.23 | 0.97 | 1.15 | 1.05 |
| O43482   | Protein Mis1i  | 0.00 | 0.00 | 1.30 | 4 | 0.97 | 1.24 | 0.95 | 1.02 | 0.96 |
| O60318   | Germinal-cer   | 0.02 | 0.12 | 1.21 | 4 | 0.94 | 1.13 | 0.94 | 1.07 | 0.96 |
| O60869   | Endothelial d  | 0.01 | 0.06 | 1.41 | 4 | 0.94 | 1.29 | 1.03 | 0.91 | 1.03 |
| O75063   | Glycosamino    | 0.00 | 0.02 | 1.41 | 4 | 1.06 | 1.32 | 0.93 | 1.08 | 1.04 |
| O75150   | E3 ubiquitin-j | 0.00 | 0.04 | 1.22 | 4 | 1.01 | 1.21 | 0.99 | 1.06 | 1.03 |
| O75386   | Tubby-relate   | 0.03 | 0.16 | 1.38 | 4 | 0.98 | 1.22 | 0.88 | 1.02 | 1.08 |
| O75676   | Ribosomal pr   | 0.00 | 0.05 | 1.43 | 4 | 1.00 | 1.18 | 0.82 | 1.11 | 0.86 |
| O75915   | PRA1 family p  | 0.01 | 0.09 | 1.21 | 4 | 1.03 | 1.12 | 0.98 | 1.00 | 0.93 |
| O94889   | Kelch-like prc | 0.01 | 0.07 | 1.39 | 4 | 0.95 | 1.22 | 0.96 | 1.11 | 0.88 |
| O95140   | Mitofusin-2 C  | 0.00 | 0.02 | 1.22 | 4 | 1.00 | 1.15 | 0.94 | 1.08 | 0.94 |
| O95685   | Protein phosj  | 0.01 | 0.06 | 1.32 | 4 | 1.06 | 1.25 | 1.05 | 1.14 | 0.94 |
| P00488   | Coagulation f  | 0.03 | 0.14 | 1.68 | 4 | 1.17 | 1.53 | 0.91 | 1.14 | 1.11 |
| P00734   | Prothrombin    | 0.00 | 0.01 | 1.81 | 4 | 0.99 | 1.52 | 0.84 | 1.13 | 0.93 |
| P00747   | Plasminogen    | 0.00 | 0.02 | 1.90 | 4 | 1.00 | 1.53 | 0.80 | 1.07 | 0.92 |
| P01008   | Antithrombin   | 0.01 | 0.06 | 1.73 | 4 | 1.05 | 1.48 | 0.85 | 1.09 | 1.01 |
| P01023   | Alpha-2-macu   | 0.00 | 0.02 | 1.84 | 4 | 1.02 | 1.49 | 0.81 | 1.06 | 0.84 |
| P01024   | Complement     | 0.00 | 0.02 | 1.79 | 4 | 1.02 | 1.50 | 0.84 | 1.09 | 0.89 |
| P01033   | Metalloprote   | 0.01 | 0.09 | 1.34 | 4 | 0.94 | 1.13 | 0.84 | 0.96 | 0.90 |
| P02042   | Hemoglobin :   | 0.00 | 0.03 | 1.44 | 4 | 0.97 | 1.21 | 0.92 | 1.17 | 0.84 |
| P02452   | Collagen alph  | 0.01 | 0.08 | 2.22 | 4 | 1.10 | 1.78 | 0.80 | 1.05 | 1.04 |
| P02461   | Collagen alph  | 0.00 | 0.03 | 1.72 | 4 | 0.98 | 1.51 | 0.88 | 1.10 | 0.89 |
| P02649   | Apolipoprote   | 0.02 | 0.12 | 1.52 | 4 | 1.00 | 1.38 | 0.91 | 1.03 | 0.94 |
| P02656   | Apolipoprote   | 0.00 | 0.02 | 1.60 | 4 | 0.99 | 1.40 | 0.87 | 1.36 | 0.97 |
| P02748   | complement     | 0.00 | 0.01 | 2.07 | 4 | 0.99 | 1.61 | 0.78 | 1.15 | 0.79 |
| P02751   | fibronectin [C | 0.00 | 0.02 | 1.56 | 4 | 1.01 | 1.36 | 0.87 | 1.04 | 0.87 |
| P02753   | Retinol-bindii | 0.00 | 0.04 | 1.75 | 4 | 1.07 | 1.47 | 0.84 | 1.08 | 0.93 |
| P02768   | Serum album    | 0.00 | 0.03 | 2.33 | 4 | 1.16 | 1.66 | 0.71 | 1.13 | 0.84 |
| P02771   | Alpha-fetopri  | 0.00 | 0.02 | 1.90 | 4 | 1.04 | 1.58 | 0.83 | 1.15 | 0.91 |
| P02787   | Serotransferr  | 0.00 | 0.04 | 1.91 | 4 | 0.97 | 1.53 | 0.80 | 1.07 | 0.85 |
| P02788   | Lactotransfer  | 0.01 | 0.06 | 1.86 | 4 | 1.21 | 1.47 | 0.79 | 1.00 | 0.87 |
| P04004   | Vitronectin [C | 0.00 | 0.01 | 1.57 | 4 | 1.01 | 1.48 | 0.94 | 1.16 | 0.99 |
| P04114   | apolipoprote   | 0.00 | 0.00 | 1.78 | 4 | 1.03 | 1.50 | 0.84 | 1.22 | 0.88 |
| P04278-1 | Sex hormone    | 0.00 | 0.05 | 1.89 | 4 | 1.05 | 1.60 | 0.84 | 1.09 | 0.98 |

|          |                                                           |      |      |      |   |      |      |      |      |      |
|----------|-----------------------------------------------------------|------|------|------|---|------|------|------|------|------|
| P04745   | Alpha-amylase                                             | 0.02 | 0.12 | 1.88 | 4 | 0.99 | 1.50 | 0.80 | 1.08 | 0.89 |
| P05156   | Complement                                                | 0.00 | 0.02 | 1.92 | 4 | 1.11 | 1.39 | 0.72 | 1.01 | 0.83 |
| P05452   | Tetranectin C                                             | 0.00 | 0.05 | 1.79 | 4 | 0.99 | 1.51 | 0.86 | 1.11 | 0.84 |
| P05543   | thyroxine-bin                                             | 0.01 | 0.07 | 1.59 | 4 | 1.00 | 1.48 | 0.93 | 1.04 | 0.98 |
| P05546   | Heparin cofactor II                                       | 0.01 | 0.09 | 2.35 | 4 | 1.24 | 1.85 | 0.79 | 1.19 | 0.82 |
| P06396   | Gelsolin OS=H                                             | 0.00 | 0.04 | 1.50 | 4 | 1.04 | 1.36 | 0.90 | 1.07 | 0.93 |
| P07358   | Complement                                                | 0.00 | 0.01 | 2.25 | 4 | 1.07 | 1.76 | 0.79 | 1.26 | 1.01 |
| P07996   | thrombospondin-1                                          | 0.00 | 0.03 | 1.84 | 4 | 1.05 | 1.47 | 0.80 | 1.07 | 0.88 |
| P08123   | Collagen alpha-1(I)                                       | 0.03 | 0.14 | 1.82 | 4 | 1.12 | 1.66 | 0.91 | 1.14 | 1.11 |
| P09234   | U1 small nuclear ribonucleoprotein A                      | 0.02 | 0.11 | 1.42 | 4 | 1.06 | 1.30 | 0.91 | 1.10 | 1.07 |
| P09486   | SPARC OS=H                                                | 0.00 | 0.05 | 1.37 | 4 | 0.98 | 1.20 | 0.88 | 0.96 | 0.94 |
| P0C0L4-1 | Complement                                                | 0.00 | 0.00 | 1.77 | 4 | 1.01 | 1.52 | 0.86 | 1.09 | 0.88 |
| P10643   | Complement                                                | 0.00 | 0.05 | 1.94 | 4 | 0.96 | 1.52 | 0.78 | 1.01 | 0.85 |
| P12109   | Collagen alpha-1(I)                                       | 0.00 | 0.05 | 1.22 | 4 | 0.99 | 1.17 | 0.96 | 1.01 | 0.96 |
| P12111   | Collagen alpha-1(I)                                       | 0.05 | 0.19 | 1.32 | 4 | 1.00 | 1.27 | 0.97 | 1.11 | 0.99 |
| P12259   | Coagulation factor XIII                                   | 0.00 | 0.02 | 1.49 | 4 | 0.98 | 1.31 | 0.88 | 1.05 | 0.93 |
| P13645   | Keratin, type I                                           | 0.01 | 0.10 | 1.77 | 4 | 1.02 | 1.54 | 0.87 | 1.14 | 0.95 |
| P13647   | Keratin, type II                                          | 0.02 | 0.12 | 1.84 | 4 | 1.03 | 1.57 | 0.85 | 1.17 | 1.10 |
| P14373   | Zinc finger protein 1                                     | 0.02 | 0.11 | 1.22 | 4 | 0.87 | 1.05 | 0.91 | 0.94 | 0.87 |
| P14927   | Cytochrome c                                              | 0.04 | 0.18 | 1.53 | 4 | 0.88 | 1.31 | 1.11 | 1.12 | 1.34 |
| P15169   | Carboxypeptidase Y                                        | 0.01 | 0.07 | 1.71 | 4 | 1.00 | 1.43 | 0.84 | 1.21 | 0.97 |
| P18440   | Arylamine N-oxidase                                       | 0.01 | 0.07 | 1.26 | 4 | 1.04 | 1.20 | 0.96 | 1.09 | 0.99 |
| P18615   | Negative elongation factor 1                              | 0.03 | 0.15 | 1.22 | 4 | 1.00 | 1.16 | 0.95 | 1.05 | 0.97 |
| P19823   | Inter-alpha-1(I) triplet                                  | 0.00 | 0.01 | 1.92 | 4 | 1.03 | 1.56 | 0.81 | 1.06 | 0.89 |
| P19827   | Inter-alpha-1(I) triplet                                  | 0.01 | 0.09 | 1.89 | 4 | 1.00 | 1.52 | 0.81 | 1.04 | 0.81 |
| P20248   | Cyclin-A2 [OS=H]                                          | 0.01 | 0.07 | 1.27 | 4 | 1.03 | 1.16 | 0.91 | 1.07 | 0.95 |
| P20742   | Pregnancy zone glycoprotein 1                             | 0.00 | 0.02 | 1.79 | 4 | 0.99 | 1.57 | 0.88 | 1.14 | 0.89 |
| P20908   | Collagen alpha-1(I)                                       | 0.00 | 0.05 | 1.78 | 4 | 1.02 | 1.54 | 0.87 | 1.11 | 0.94 |
| P23142   | Fibulin-1 [OS=H]                                          | 0.00 | 0.03 | 1.64 | 4 | 0.99 | 1.41 | 0.86 | 1.11 | 0.88 |
| P35443   | Thrombospondin-1                                          | 0.00 | 0.01 | 1.79 | 4 | 1.02 | 1.46 | 0.82 | 1.12 | 0.87 |
| P36955   | Pigment epithelium-specific adhesion molecule             | 0.01 | 0.09 | 1.41 | 4 | 1.00 | 1.28 | 0.90 | 0.98 | 0.91 |
| P40189   | Interleukin-6                                             | 0.03 | 0.16 | 1.31 | 4 | 0.94 | 1.23 | 1.03 | 1.08 | 1.07 |
| P42575-1 | caspase-2 [OS=H]                                          | 0.01 | 0.07 | 1.27 | 4 | 1.01 | 1.15 | 0.91 | 1.15 | 0.98 |
| P49747   | Cartilage oligomeric matrix protein                       | 0.00 | 0.02 | 2.00 | 4 | 1.02 | 1.56 | 0.78 | 1.09 | 0.83 |
| P51530   | DNA replication fork protein                              | 0.00 | 0.05 | 1.24 | 4 | 0.97 | 1.14 | 0.93 | 1.05 | 0.94 |
| P51884   | Lumican OS=H                                              | 0.01 | 0.06 | 1.60 | 4 | 1.05 | 1.40 | 0.88 | 1.05 | 0.92 |
| P62877   | E3 ubiquitin-protein ligase complex                       | 0.00 | 0.02 | 1.73 | 4 | 1.11 | 1.05 | 0.64 | 0.94 | 0.84 |
| P62942   | Peptidyl-prolyl 4-hydroxylase                             | 0.01 | 0.10 | 1.25 | 4 | 1.00 | 1.12 | 0.93 | 1.03 | 0.90 |
| P69905   | Hemoglobin subunit beta                                   | 0.01 | 0.10 | 1.33 | 4 | 1.07 | 1.22 | 0.92 | 1.12 | 1.02 |
| P82921   | 28S ribosomal protein L24                                 | 0.02 | 0.11 | 1.21 | 4 | 1.04 | 1.15 | 0.95 | 1.07 | 1.01 |
| P98179   | RNA-binding protein 1                                     | 0.01 | 0.08 | 1.30 | 4 | 0.98 | 1.14 | 0.87 | 1.11 | 0.90 |
| Q02818   | Nucleobindin 1                                            | 0.02 | 0.11 | 1.22 | 4 | 1.01 | 1.16 | 0.95 | 1.09 | 0.99 |
| Q03692   | Collagen alpha-1(I)                                       | 0.00 | 0.05 | 1.55 | 4 | 0.99 | 1.28 | 0.82 | 1.03 | 0.95 |
| Q04756   | Hepatocyte glycoprotein 2                                 | 0.01 | 0.10 | 1.60 | 4 | 1.07 | 1.47 | 0.92 | 1.09 | 1.06 |
| Q05048   | Cleavage stimulation factor                               | 0.00 | 0.05 | 1.21 | 4 | 0.96 | 1.07 | 0.93 | 1.03 | 0.89 |
| Q06033-1 | Inter-alpha-1(I) triplet                                  | 0.00 | 0.01 | 2.06 | 4 | 0.99 | 1.55 | 0.75 | 1.09 | 0.82 |
| Q06587   | E3 ubiquitin-protein ligase complex                       | 0.00 | 0.01 | 1.36 | 4 | 0.94 | 1.21 | 0.92 | 1.09 | 0.89 |
| Q12805   | EGF-containing fibulin type 1 domain containing protein 1 | 0.00 | 0.03 | 1.68 | 4 | 1.05 | 1.44 | 0.91 | 1.12 | 0.86 |
| Q12834   | cell division cycle 20                                    | 0.00 | 0.03 | 1.30 | 4 | 0.95 | 1.05 | 0.82 | 1.01 | 0.81 |
| Q12860   | Contactin-1 C                                             | 0.04 | 0.18 | 1.25 | 4 | 1.00 | 1.17 | 0.93 | 0.98 | 0.97 |
| Q13243   | Serine/arginine repeat domain containing protein 1        | 0.00 | 0.02 | 1.27 | 4 | 0.98 | 1.14 | 0.90 | 1.08 | 0.92 |
| Q13501-1 | sequestosome 1                                            | 0.00 | 0.01 | 1.27 | 4 | 1.01 | 1.14 | 0.90 | 1.08 | 0.96 |
| Q14457   | Beclin-1 OS=H                                             | 0.05 | 0.19 | 1.36 | 4 | 1.02 | 1.24 | 0.91 | 1.04 | 1.01 |
| Q14554   | Protein disulfide isomerase A6                            | 0.01 | 0.05 | 1.21 | 4 | 0.91 | 1.03 | 0.87 | 0.88 | 1.05 |
| Q147X3   | N-alpha-acetyltransferase 1                               | 0.02 | 0.10 | 1.22 | 4 | 0.94 | 1.13 | 0.92 | 1.05 | 0.93 |
| Q14849-1 | StAR-related lipid transfer domain containing protein 1   | 0.00 | 0.04 | 1.52 | 4 | 1.03 | 1.55 | 1.02 | 1.07 | 1.02 |
| Q15058   | Kinesin-like protein 1                                    | 0.01 | 0.10 | 1.23 | 4 | 1.04 | 1.13 | 0.93 | 1.00 | 0.96 |
| Q15063   | Periostin OS=H                                            | 0.00 | 0.04 | 1.76 | 4 | 1.02 | 1.52 | 0.86 | 1.14 | 0.92 |
| Q15233   | Non-POU domain containing protein 1                       | 0.00 | 0.03 | 1.21 | 4 | 0.94 | 1.02 | 0.87 | 1.00 | 0.85 |
| Q15582   | Transforming growth factor beta-1                         | 0.00 | 0.02 | 1.80 | 4 | 1.05 | 1.46 | 0.81 | 1.08 | 0.93 |
| Q15650   | Activating transcription factor 1                         | 0.05 | 0.19 | 1.21 | 4 | 1.08 | 1.20 | 0.99 | 1.08 | 1.07 |
| Q15831   | Serine/threonine phosphatase 1                            | 0.00 | 0.01 | 1.33 | 4 | 0.97 | 1.21 | 0.92 | 1.02 | 0.96 |
| Q15836   | Vesicle-associated membrane protein 3                     | 0.04 | 0.17 | 1.27 | 4 | 1.00 | 1.23 | 0.97 | 1.03 | 1.04 |
| Q562R1   | Beta-actin-like domain containing protein 1               | 0.00 | 0.01 | 1.25 | 4 | 0.94 | 1.17 | 0.98 | 1.18 | 0.98 |
| Q58FF7   | Putative heat shock protein 70                            | 0.01 | 0.09 | 1.31 | 4 | 1.05 | 1.18 | 0.92 | 1.01 | 0.90 |
| Q5J8M3   | ER membrane protein 1                                     | 0.02 | 0.13 | 1.22 | 4 | 0.94 | 1.05 | 0.92 | 1.00 | 0.87 |
| Q55QN1-1 | Synaptosome-associated protein 2                          | 0.00 | 0.04 | 1.23 | 4 | 1.00 | 1.15 | 0.96 | 1.05 | 0.93 |
| Q5VSG8-1 | Glycoprotein 2                                            | 0.02 | 0.10 | 1.29 | 4 | 1.08 | 1.16 | 0.94 | 1.09 | 0.90 |
| Q66GS9   | Centrosomal protein of 97 kDa                             | 0.00 | 0.04 | 1.25 | 4 | 0.92 | 1.08 | 0.90 | 0.97 | 0.87 |

|          |                 |      |      |      |   |      |      |      |      |      |
|----------|-----------------|------|------|------|---|------|------|------|------|------|
| Q68CL5-5 | Isoform 5 of    | 0.00 | 0.02 | 1.51 | 4 | 0.99 | 1.27 | 0.84 | 1.11 | 0.99 |
| Q69YQ0-1 | Cytospin-A [C   | 0.01 | 0.10 | 1.23 | 4 | 1.00 | 1.12 | 0.91 | 1.00 | 0.92 |
| Q6NUN9   | Zinc finger pr  | 0.02 | 0.11 | 1.36 | 4 | 1.01 | 1.25 | 0.92 | 1.03 | 0.99 |
| Q7L3T8   | probable pro    | 0.00 | 0.03 | 1.24 | 4 | 1.00 | 1.12 | 0.90 | 1.01 | 0.94 |
| Q7Z6J8   | E3 ubiquitin-γ  | 0.00 | 0.04 | 1.40 | 4 | 0.96 | 1.23 | 0.92 | 1.07 | 0.88 |
| Q86UD1   | Out at first pr | 0.03 | 0.14 | 1.37 | 4 | 1.00 | 1.29 | 0.94 | 0.96 | 1.04 |
| Q8IWA4   | Mitofusin-1 C   | 0.00 | 0.01 | 1.22 | 4 | 1.02 | 1.19 | 0.98 | 1.13 | 1.00 |
| Q8NCD3   | Holliday junci  | 0.00 | 0.03 | 1.44 | 4 | 0.92 | 1.22 | 0.87 | 1.04 | 0.84 |
| Q8NFI3   | Cytosolic end   | 0.00 | 0.03 | 1.24 | 4 | 0.98 | 1.22 | 0.99 | 1.05 | 1.01 |
| Q8NFP9   | Neurobeachii    | 0.04 | 0.18 | 1.26 | 4 | 1.04 | 1.22 | 1.00 | 1.05 | 0.97 |
| Q8WVD5-1 | RING finger p   | 0.03 | 0.15 | 1.28 | 4 | 1.07 | 1.29 | 1.01 | 1.21 | 1.06 |
| Q8WV10   | Small integra   | 0.02 | 0.11 | 1.34 | 4 | 0.98 | 1.23 | 0.92 | 1.10 | 1.10 |
| Q8WVQ1   | Soluble calci   | 0.02 | 0.12 | 1.27 | 4 | 1.05 | 1.22 | 0.96 | 1.10 | 1.00 |
| Q8WXX5   | dnaJ homoloγ    | 0.02 | 0.10 | 1.21 | 4 | 1.00 | 1.10 | 0.91 | 1.03 | 0.99 |
| Q8WYA0   | Intraflagellar  | 0.01 | 0.07 | 1.29 | 4 | 1.01 | 1.24 | 0.96 | 1.07 | 0.97 |
| Q8WYQ5-1 | Microprocess    | 0.01 | 0.09 | 1.21 | 4 | 0.99 | 1.12 | 0.93 | 1.06 | 0.92 |
| Q92734-1 | Protein TFG [   | 0.00 | 0.03 | 1.25 | 4 | 0.94 | 1.11 | 0.89 | 1.04 | 0.93 |
| Q92997   | segment pola    | 0.00 | 0.02 | 1.29 | 4 | 0.98 | 1.21 | 0.87 | 1.04 | 0.90 |
| Q96CN9   | GRIP and coil   | 0.01 | 0.09 | 1.29 | 4 | 0.94 | 1.07 | 0.91 | 1.01 | 0.83 |
| Q96F63   | Coiled-coil dc  | 0.01 | 0.08 | 1.39 | 4 | 1.00 | 1.22 | 0.88 | 1.05 | 0.92 |
| Q96GQ5-1 | RUS1 family γ   | 0.02 | 0.11 | 1.23 | 4 | 0.96 | 1.13 | 0.94 | 0.99 | 0.92 |
| Q96HQ2-1 | CDKN2AIP N-     | 0.01 | 0.05 | 1.29 | 4 | 0.93 | 1.14 | 0.93 | 1.05 | 0.88 |
| Q96I51   | RCC1-like G e   | 0.00 | 0.01 | 1.24 | 4 | 0.96 | 1.06 | 0.89 | 0.95 | 0.86 |
| Q96IY1   | Kinetochore-    | 0.00 | 0.03 | 1.28 | 4 | 1.06 | 1.18 | 0.92 | 1.00 | 0.97 |
| Q96J42   | Thioredoxin c   | 0.03 | 0.14 | 1.25 | 4 | 0.92 | 1.09 | 0.88 | 1.04 | 0.88 |
| Q96R06   | Sperm-associ    | 0.01 | 0.09 | 1.28 | 4 | 1.03 | 1.17 | 0.91 | 1.02 | 0.96 |
| Q96SZ6   | CDK5 regulat    | 0.01 | 0.06 | 1.22 | 4 | 0.95 | 1.12 | 0.92 | 1.08 | 1.01 |
| Q99435-1 | Protein kinas   | 0.00 | 0.00 | 1.62 | 4 | 1.00 | 1.38 | 0.86 | 1.17 | 0.85 |
| Q99719   | Septin-5 OS=    | 0.00 | 0.02 | 1.72 | 4 | 1.00 | 1.40 | 0.81 | 1.04 | 0.88 |
| Q9BRJ6   | Uncharacteri    | 0.05 | 0.19 | 1.24 | 4 | 0.90 | 1.02 | 0.88 | 0.90 | 0.83 |
| Q9BVV7   | Mitochondria    | 0.05 | 0.19 | 1.31 | 4 | 1.00 | 1.24 | 0.95 | 1.05 | 1.02 |
| Q9BW72   | HIG1 domain     | 0.00 | 0.01 | 1.77 | 4 | 1.10 | 1.73 | 1.12 | 1.09 | 0.98 |
| Q9BZP6   | Acidic mamr     | 0.04 | 0.17 | 1.43 | 4 | 1.04 | 1.11 | 0.77 | 0.95 | 0.81 |
| Q9H4B7   | tubulin beta-   | 0.01 | 0.06 | 1.50 | 4 | 0.93 | 1.36 | 0.90 | 1.16 | 1.01 |
| Q9HC07   | Transmembr.     | 0.00 | 0.01 | 1.25 | 4 | 1.00 | 1.24 | 0.99 | 1.17 | 1.09 |
| Q9NP58   | ATP-binding t   | 0.03 | 0.16 | 1.26 | 4 | 1.04 | 1.22 | 0.97 | 1.05 | 0.97 |
| Q9NQ89   | protein C12o    | 0.02 | 0.12 | 1.22 | 4 | 0.94 | 1.15 | 0.95 | 1.06 | 1.03 |
| Q9NS73   | MAP3K12-bir     | 0.03 | 0.14 | 1.23 | 4 | 1.06 | 1.24 | 1.02 | 1.00 | 1.08 |
| Q9NW81   | ATP synthase    | 0.01 | 0.07 | 1.26 | 4 | 0.93 | 1.15 | 0.92 | 0.95 | 0.92 |
| Q9NXX8   | F-box/LRR-re    | 0.03 | 0.15 | 1.24 | 4 | 1.09 | 1.26 | 1.02 | 1.11 | 1.06 |
| Q9NYF8-1 | Bcl-2-associ    | 0.00 | 0.03 | 1.21 | 4 | 0.99 | 1.12 | 0.93 | 1.07 | 0.94 |
| Q9NYF8-3 | Isoform 3 of l  | 0.05 | 0.19 | 1.25 | 4 | 0.89 | 1.03 | 0.85 | 0.94 | 0.83 |
| Q9NZI7   | Upstream-bir    | 0.02 | 0.11 | 1.25 | 4 | 0.98 | 1.15 | 0.92 | 1.04 | 1.00 |
| Q9NZJ4-1 | Sacsin [OS=H    | 0.05 | 0.19 | 1.26 | 4 | 1.05 | 1.22 | 0.97 | 1.07 | 1.04 |
| Q9NZZ3   | Charged mult    | 0.00 | 0.04 | 1.24 | 4 | 1.01 | 1.12 | 0.91 | 1.01 | 0.95 |
| Q9P003   | Protein corni   | 0.01 | 0.08 | 1.27 | 4 | 1.05 | 1.25 | 0.99 | 1.09 | 1.07 |
| Q9P2J9   | [Pyruvate del   | 0.05 | 0.19 | 1.33 | 4 | 0.91 | 1.21 | 1.02 | 1.05 | 0.96 |
| Q9P2L0-1 | WD repeat-cr    | 0.00 | 0.02 | 1.23 | 4 | 0.97 | 1.13 | 0.92 | 1.07 | 0.93 |
| Q9UFC0   | Leucine-rich    | 0.00 | 0.03 | 1.32 | 4 | 0.97 | 1.16 | 0.92 | 1.01 | 0.88 |
| Q9UFG5   | UPF0449 pro     | 0.01 | 0.09 | 1.56 | 4 | 0.92 | 1.39 | 0.89 | 1.19 | 0.91 |
| Q9UJA3   | DNA helicase    | 0.03 | 0.14 | 1.49 | 4 | 1.04 | 1.32 | 0.89 | 1.17 | 0.99 |
| Q9UK97   | F-box only pr   | 0.02 | 0.10 | 1.24 | 4 | 1.02 | 1.24 | 1.00 | 1.20 | 1.02 |
| Q9UK99   | F-box only pr   | 0.00 | 0.03 | 1.51 | 4 | 0.95 | 1.28 | 0.87 | 1.09 | 0.85 |
| Q9UQL6-3 | Isoform 3 of l  | 0.04 | 0.17 | 1.26 | 4 | 0.98 | 1.23 | 0.99 | 1.02 | 1.03 |
| Q9Y2G8   | DnaJ homolo     | 0.04 | 0.18 | 1.46 | 4 | 0.95 | 1.21 | 0.88 | 1.01 | 0.83 |
| Q9Y2W1   | Thyroid horr    | 0.00 | 0.03 | 1.26 | 4 | 0.98 | 1.12 | 0.89 | 1.02 | 0.97 |
| Q9Y2W6   | tudor and KH    | 0.04 | 0.17 | 1.20 | 4 | 1.03 | 1.20 | 1.02 | 1.09 | 0.99 |
| Q9Y3D0   | Mitotic spind   | 0.02 | 0.12 | 1.28 | 4 | 1.01 | 1.15 | 0.95 | 1.08 | 0.90 |
| Q9Y3D8   | Adenylate kir   | 0.04 | 0.16 | 1.30 | 4 | 0.96 | 1.24 | 1.00 | 1.03 | 1.01 |
| Q9Y605   | MORF4 famil     | 0.01 | 0.10 | 1.25 | 4 | 0.92 | 1.15 | 0.92 | 1.03 | 0.93 |

| Accession | Description    | Anova | Anova.adj | MaxFC | Clusters | Means.C | Means.T1 | Means.T2 | Means.T3 | Means.T4 |
|-----------|----------------|-------|-----------|-------|----------|---------|----------|----------|----------|----------|
| O00233    | 26S proteaso   | 0.02  | 0.12      | 1.39  | 1        | 1.06    | 0.86     | 0.99     | 0.76     | 0.96     |
| O00244    | Copper trans   | 0.00  | 0.01      | 1.40  | 1        | 1.11    | 0.79     | 1.03     | 0.81     | 1.11     |
| O43920    | NADH dehydi    | 0.01  | 0.08      | 1.24  | 1        | 1.05    | 0.87     | 0.97     | 0.85     | 1.04     |
| O60879    | Protein diaph  | 0.04  | 0.17      | 1.22  | 1        | 1.03    | 1.09     | 1.00     | 0.95     | 1.16     |
| O75208    | Ubiquinone b   | 0.02  | 0.11      | 1.20  | 1        | 1.04    | 0.89     | 1.01     | 0.90     | 1.06     |
| O75380    | NADH dehydi    | 0.02  | 0.12      | 1.24  | 1        | 1.01    | 0.98     | 1.08     | 0.87     | 1.05     |
| O75822    | Eukaryotic tr: | 0.00  | 0.02      | 1.31  | 1        | 1.00    | 0.92     | 1.05     | 0.86     | 1.13     |
| P06280    | Alpha-galactc  | 0.00  | 0.02      | 1.23  | 1        | 1.09    | 0.89     | 0.97     | 0.89     | 1.05     |
| P07108-5  | Isoform 5 of / | 0.02  | 0.11      | 1.37  | 1        | 1.01    | 0.88     | 0.99     | 0.75     | 1.03     |
| P07602    | Prosaposin O   | 0.02  | 0.11      | 1.40  | 1        | 1.07    | 0.76     | 0.90     | 0.86     | 1.02     |
| P11441    | Ubiquitin-like | 0.02  | 0.13      | 1.25  | 1        | 1.11    | 0.89     | 0.89     | 0.90     | 0.96     |
| P13674-1  | prolyl 4-hydr  | 0.01  | 0.08      | 1.21  | 1        | 0.93    | 1.01     | 0.96     | 0.98     | 1.14     |
| P29966    | Myristoylatec  | 0.02  | 0.11      | 1.52  | 1        | 1.05    | 0.77     | 1.10     | 0.80     | 1.17     |
| P35237    | Serpin B6 OS:  | 0.01  | 0.08      | 1.27  | 1        | 1.11    | 0.87     | 0.95     | 0.91     | 1.07     |
| P49006    | MARCKS-rela    | 0.02  | 0.11      | 1.53  | 1        | 1.06    | 0.83     | 1.04     | 0.85     | 1.27     |
| P60903    | Protein S100-  | 0.00  | 0.01      | 1.35  | 1        | 1.07    | 0.84     | 1.02     | 0.83     | 1.12     |
| P62857    | 40S ribosomz   | 0.00  | 0.05      | 1.25  | 1        | 0.99    | 0.87     | 0.91     | 0.80     | 0.87     |
| P99999    | cytochrome c   | 0.01  | 0.06      | 1.48  | 1        | 1.17    | 0.98     | 1.09     | 0.79     | 1.03     |
| Q00688    | peptidyl-proh  | 0.01  | 0.08      | 1.31  | 1        | 1.05    | 0.94     | 1.01     | 0.86     | 1.13     |
| Q13303-3  | Isoform 3 of \ | 0.03  | 0.15      | 1.20  | 1        | 1.03    | 0.96     | 1.04     | 0.92     | 1.11     |
| Q14008    | Cytoskeleton   | 0.00  | 0.01      | 1.25  | 1        | 0.98    | 0.87     | 1.00     | 0.82     | 1.03     |
| Q15637    | Splicing facto | 0.03  | 0.14      | 1.28  | 1        | 1.09    | 0.98     | 0.96     | 0.96     | 1.22     |
| Q16773    | Kynurenine--   | 0.02  | 0.12      | 1.44  | 1        | 1.06    | 0.90     | 1.02     | 0.81     | 1.17     |
| Q5TON5-1  | Formin-bindin  | 0.03  | 0.14      | 1.22  | 1        | 1.05    | 1.06     | 1.02     | 0.94     | 1.14     |
| Q8N983    | 39S ribosomz   | 0.04  | 0.16      | 1.38  | 1        | 0.89    | 1.04     | 1.18     | 0.85     | 1.04     |
| Q8WW12    | PEST proteoly  | 0.00  | 0.01      | 1.58  | 1        | 1.08    | 0.76     | 1.06     | 0.69     | 1.06     |
| Q8WY22    | BRI3-binding   | 0.01  | 0.09      | 1.27  | 1        | 1.02    | 1.07     | 0.96     | 0.84     | 1.02     |
| Q92945    | Far upstream   | 0.00  | 0.02      | 1.27  | 1        | 1.06    | 0.85     | 0.89     | 0.83     | 0.98     |
| Q96AE4    | Far upstream   | 0.02  | 0.11      | 1.47  | 1        | 1.15    | 0.81     | 0.89     | 0.78     | 0.98     |
| Q96BR5    | Cytochrome c   | 0.03  | 0.15      | 1.21  | 1        | 1.03    | 0.95     | 0.98     | 0.91     | 1.10     |
| Q99576    | TSC22 domai    | 0.00  | 0.02      | 1.51  | 1        | 1.20    | 1.01     | 0.98     | 1.04     | 1.48     |
| Q9BWS9    | Chitinase dor  | 0.00  | 0.05      | 1.24  | 1        | 0.98    | 0.87     | 1.02     | 0.88     | 1.08     |
| Q9HAV7    | GrpE protein   | 0.02  | 0.11      | 1.23  | 1        | 1.03    | 1.03     | 1.10     | 0.93     | 1.14     |
| Q9NP97    | Dynein light c | 0.00  | 0.00      | 1.33  | 1        | 1.05    | 0.86     | 0.99     | 0.81     | 1.08     |
| Q9NZ45    | CDGSH iron-s   | 0.01  | 0.07      | 1.21  | 1        | 1.06    | 1.11     | 1.10     | 1.03     | 1.25     |
| Q9POL2-1  | Serine/threoi  | 0.02  | 0.12      | 1.32  | 1        | 1.01    | 0.89     | 1.04     | 1.00     | 1.17     |
| Q9UHR5-1  | SAP30-bindin   | 0.00  | 0.02      | 1.27  | 1        | 1.10    | 1.00     | 1.07     | 0.96     | 1.22     |
| Q9Y3E2    | Bola-like prot | 0.02  | 0.11      | 1.41  | 1        | 1.22    | 0.89     | 1.02     | 0.87     | 1.19     |



| Accession | Description     | Anova | Anova.adj | MaxFC | Clusters | Means.C | Means.T1 | Means.T2 | Means.T3 | Means.T4 |
|-----------|-----------------|-------|-----------|-------|----------|---------|----------|----------|----------|----------|
| O00273-2  | Isoform DFF3    | 0.00  | 0.01      | 1.49  | 2        | 0.91    | 1.12     | 0.86     | 1.00     | 0.75     |
| O00483    | Cytochrome c    | 0.00  | 0.02      | 1.22  | 2        | 0.98    | 0.91     | 1.05     | 0.93     | 0.86     |
| O00767    | Acyl-CoA des    | 0.01  | 0.07      | 1.25  | 2        | 0.97    | 1.13     | 0.96     | 1.12     | 0.90     |
| O15514    | DNA-directec    | 0.03  | 0.14      | 1.25  | 2        | 0.99    | 1.12     | 1.04     | 1.09     | 0.90     |
| O43818    | U3 small nucl   | 0.00  | 0.02      | 1.26  | 2        | 0.97    | 1.10     | 0.96     | 1.15     | 0.91     |
| O43933    | Peroxisome t    | 0.00  | 0.01      | 1.22  | 2        | 1.05    | 1.02     | 0.96     | 1.10     | 0.90     |
| O60216    | Double-stran    | 0.00  | 0.01      | 1.30  | 2        | 0.97    | 1.16     | 0.90     | 1.07     | 0.89     |
| O60814    | Histone H2B 1   | 0.00  | 0.01      | 1.44  | 2        | 0.93    | 1.24     | 0.86     | 1.24     | 0.87     |
| O75182-2  | Isoform 2 of f  | 0.00  | 0.01      | 1.41  | 2        | 0.99    | 1.18     | 0.86     | 1.08     | 0.84     |
| O75367    | Core histone    | 0.03  | 0.15      | 1.29  | 2        | 0.98    | 1.10     | 0.97     | 1.18     | 0.92     |
| O95490-1  | Adhesion G p    | 0.03  | 0.14      | 1.21  | 2        | 0.98    | 1.08     | 0.92     | 1.04     | 0.89     |
| O96000    | NADH dehydi     | 0.01  | 0.08      | 1.23  | 2        | 0.94    | 1.16     | 1.02     | 1.09     | 0.96     |
| P04920-1  | Anion exchan    | 0.00  | 0.01      | 1.37  | 2        | 0.98    | 1.12     | 0.98     | 1.20     | 0.87     |
| P07910-1  | Heterogeneo     | 0.00  | 0.02      | 1.41  | 2        | 0.93    | 1.18     | 0.85     | 1.05     | 0.83     |
| P07910-2  | Isoform C1 of   | 0.00  | 0.02      | 1.29  | 2        | 0.94    | 1.03     | 0.88     | 1.06     | 0.82     |
| P08247    | Synaptophys     | 0.04  | 0.18      | 1.22  | 2        | 1.01    | 1.14     | 1.00     | 1.22     | 1.02     |
| P08670    | Vimentin [OS    | 0.00  | 0.05      | 1.22  | 2        | 0.93    | 1.08     | 0.98     | 1.14     | 0.97     |
| P09601    | heme oxygen     | 0.00  | 0.00      | 1.92  | 2        | 0.94    | 1.81     | 1.09     | 1.58     | 1.04     |
| P0C0S5    | Histone H2A..   | 0.03  | 0.15      | 1.28  | 2        | 0.90    | 1.16     | 0.95     | 1.12     | 0.90     |
| P0C0S8    | Histone H2A 1   | 0.03  | 0.16      | 1.64  | 2        | 0.99    | 1.44     | 0.87     | 1.34     | 0.96     |
| P23246-1  | splicing facto  | 0.00  | 0.03      | 1.28  | 2        | 0.97    | 1.03     | 0.89     | 1.08     | 0.85     |
| P25912-1  | Protein max [   | 0.00  | 0.03      | 1.25  | 2        | 0.95    | 1.12     | 0.97     | 1.05     | 0.89     |
| P27707    | deoxycytidine   | 0.00  | 0.02      | 1.30  | 2        | 0.95    | 1.17     | 0.90     | 1.07     | 0.91     |
| P31942    | Heterogeneo     | 0.01  | 0.06      | 1.21  | 2        | 0.97    | 1.01     | 0.90     | 1.06     | 0.87     |
| P33552    | Cyclin-depen    | 0.00  | 0.04      | 1.24  | 2        | 1.01    | 1.17     | 0.96     | 1.11     | 0.94     |
| P37268    | Squalene syn    | 0.00  | 0.00      | 1.26  | 2        | 0.97    | 1.14     | 0.99     | 1.18     | 0.93     |
| P40337    | von Hippel-Li   | 0.04  | 0.18      | 1.32  | 2        | 1.05    | 1.11     | 0.91     | 1.08     | 0.84     |
| P51610-1  | Host cell fact  | 0.03  | 0.13      | 1.34  | 2        | 0.96    | 1.01     | 0.89     | 0.99     | 0.76     |
| P51991    | Heterogeneo     | 0.00  | 0.01      | 1.26  | 2        | 1.00    | 1.06     | 0.85     | 1.03     | 0.87     |
| P54725-3  | Isoform 3 of l  | 0.04  | 0.17      | 1.26  | 2        | 0.97    | 0.93     | 0.91     | 0.99     | 0.78     |
| P55268    | Laminin subu    | 0.00  | 0.03      | 1.36  | 2        | 1.00    | 1.17     | 0.88     | 1.12     | 0.86     |
| P62805    | histone H4 [C   | 0.00  | 0.01      | 1.55  | 2        | 0.90    | 1.39     | 0.92     | 1.39     | 0.94     |
| P67809    | Nuclease-sen    | 0.01  | 0.09      | 1.24  | 2        | 0.95    | 0.96     | 0.93     | 1.02     | 0.82     |
| Q00059    | Transcription   | 0.00  | 0.04      | 1.38  | 2        | 0.93    | 1.29     | 0.96     | 1.16     | 0.94     |
| Q13111-1  | Chromatin as    | 0.05  | 0.19      | 1.30  | 2        | 0.95    | 1.10     | 0.87     | 1.00     | 0.85     |
| Q13151    | Heterogeneo     | 0.00  | 0.01      | 1.23  | 2        | 0.97    | 1.11     | 0.90     | 1.08     | 0.90     |
| Q13370    | cGMP-inhibit    | 0.01  | 0.07      | 1.20  | 2        | 1.00    | 1.10     | 0.93     | 1.10     | 0.91     |
| Q13686    | DNA oxidativ    | 0.00  | 0.02      | 1.21  | 2        | 0.96    | 1.06     | 0.88     | 1.03     | 0.88     |
| Q14186    | Transcription   | 0.04  | 0.18      | 1.27  | 2        | 0.92    | 1.09     | 0.91     | 1.06     | 0.86     |
| Q14689    | Disco-interac   | 0.03  | 0.15      | 1.34  | 2        | 0.96    | 1.09     | 0.81     | 1.04     | 0.82     |
| Q15493    | Regucalcin O'   | 0.00  | 0.01      | 1.75  | 2        | 0.92    | 1.37     | 0.81     | 1.10     | 0.78     |
| Q15628    | Tumor necro:    | 0.00  | 0.03      | 1.21  | 2        | 0.96    | 1.09     | 0.93     | 1.12     | 0.94     |
| Q32MZ4-4  | Isoform 4 of l  | 0.01  | 0.07      | 1.33  | 2        | 0.91    | 1.04     | 0.87     | 1.10     | 0.83     |
| Q3B726    | DNA-directec    | 0.00  | 0.03      | 1.23  | 2        | 0.97    | 1.06     | 0.86     | 1.03     | 0.90     |
| Q5EBL8    | PDZ domain-r    | 0.01  | 0.08      | 1.32  | 2        | 0.93    | 1.12     | 0.90     | 1.06     | 0.85     |
| Q5HYI7    | Metaxin-3 OS    | 0.00  | 0.00      | 1.30  | 2        | 0.95    | 1.17     | 0.97     | 1.10     | 0.90     |
| Q5JPI3    | Uncharacteri:   | 0.00  | 0.02      | 1.27  | 2        | 0.97    | 0.95     | 0.92     | 0.98     | 0.77     |
| Q5QJE6    | Deoxynucleo:    | 0.05  | 0.19      | 1.22  | 2        | 0.96    | 1.05     | 0.91     | 1.11     | 1.00     |
| Q5T447    | E3 ubiquitin-;  | 0.01  | 0.06      | 1.21  | 2        | 0.99    | 1.00     | 1.00     | 1.09     | 0.90     |
| Q6DCA0    | AMMECR1-li:     | 0.04  | 0.18      | 1.24  | 2        | 0.88    | 1.02     | 1.06     | 1.09     | 0.90     |
| Q6DKI1    | 60S ribosom:    | 0.04  | 0.17      | 1.21  | 2        | 0.91    | 1.06     | 0.91     | 1.09     | 0.94     |
| Q6NUS6    | Tectonic-3 O:   | 0.02  | 0.12      | 1.23  | 2        | 1.04    | 1.21     | 0.99     | 1.18     | 1.01     |
| Q6P4I2    | WD repeat-cc    | 0.01  | 0.07      | 1.22  | 2        | 1.02    | 1.15     | 0.94     | 1.11     | 0.98     |
| Q6PI26    | Protein SHQ1    | 0.00  | 0.05      | 1.32  | 2        | 1.00    | 1.14     | 0.86     | 1.09     | 0.93     |
| Q6SPF0    | Atherin OS=H    | 0.00  | 0.05      | 1.32  | 2        | 0.98    | 1.02     | 1.02     | 1.14     | 0.86     |
| Q71F23    | Centromere ;    | 0.00  | 0.02      | 1.40  | 2        | 0.93    | 1.11     | 0.79     | 1.00     | 0.85     |
| Q7Z309    | Protein FAM:    | 0.00  | 0.02      | 1.35  | 2        | 0.92    | 1.03     | 0.89     | 0.99     | 0.76     |
| Q8IUI8    | Cytokine rece   | 0.00  | 0.01      | 1.26  | 2        | 0.98    | 1.08     | 0.89     | 1.01     | 0.85     |
| Q8IVB5    | LIX1-like prot  | 0.04  | 0.17      | 1.28  | 2        | 0.97    | 0.93     | 0.86     | 0.97     | 0.76     |
| Q8IWA0    | WD repeat-cc    | 0.00  | 0.02      | 1.22  | 2        | 0.96    | 1.13     | 0.95     | 1.16     | 1.01     |
| Q8IWL3    | Iron-sulfur cl  | 0.04  | 0.18      | 1.37  | 2        | 0.93    | 1.19     | 0.90     | 1.10     | 0.87     |
| Q8N2G8    | GH3 domain-     | 0.00  | 0.05      | 1.25  | 2        | 0.89    | 0.97     | 0.87     | 0.93     | 0.78     |
| Q8N3Z3-1  | GTP-binding ;   | 0.02  | 0.10      | 1.23  | 2        | 0.92    | 0.93     | 0.91     | 0.98     | 0.79     |
| Q8N5N7    | 39S ribosom:    | 0.00  | 0.05      | 1.39  | 2        | 0.91    | 1.10     | 0.87     | 1.04     | 0.79     |
| Q8N8A6    | ATP-depende     | 0.01  | 0.07      | 1.29  | 2        | 0.98    | 1.03     | 0.87     | 1.08     | 0.84     |
| Q8NFG4    | Folliculin OS=  | 0.00  | 0.02      | 1.30  | 2        | 1.04    | 1.15     | 0.94     | 1.12     | 0.88     |
| Q8TED0    | U3 small nucl   | 0.03  | 0.14      | 1.21  | 2        | 0.97    | 1.09     | 0.93     | 1.12     | 0.99     |
| Q8WU76-1  | Sec1 family d   | 0.03  | 0.15      | 1.42  | 2        | 0.86    | 0.91     | 0.83     | 1.05     | 0.74     |
| Q8WVB6    | Chromosome      | 0.00  | 0.01      | 1.45  | 2        | 1.02    | 1.17     | 0.81     | 1.04     | 0.82     |
| Q92673    | Sortilin-relate | 0.00  | 0.05      | 1.30  | 2        | 0.88    | 1.12     | 1.01     | 1.05     | 0.87     |
| Q969X6    | U3 small nucl   | 0.04  | 0.18      | 1.21  | 2        | 0.91    | 1.04     | 0.96     | 1.11     | 1.02     |
| Q96D15    | Reticulocalbir  | 0.00  | 0.00      | 2.02  | 2        | 1.00    | 1.45     | 0.76     | 1.09     | 0.72     |

|          |                |      |      |      |   |      |      |      |      |      |
|----------|----------------|------|------|------|---|------|------|------|------|------|
| Q96FX8   | p53 apoptosi   | 0.01 | 0.08 | 1.33 | 2 | 0.97 | 0.99 | 0.98 | 1.02 | 0.77 |
| Q96G21   | U3 small nucl  | 0.01 | 0.06 | 1.21 | 2 | 0.95 | 1.01 | 0.93 | 1.02 | 0.85 |
| Q96JA3   | Pleckstrin ho  | 0.00 | 0.02 | 1.43 | 2 | 1.18 | 1.09 | 0.89 | 1.27 | 0.99 |
| Q96ME7   | Zinc finger pr | 0.01 | 0.09 | 1.24 | 2 | 0.98 | 0.96 | 0.85 | 1.05 | 0.84 |
| Q96T23   | remodeling a   | 0.05 | 0.18 | 1.23 | 2 | 0.91 | 1.07 | 1.07 | 1.11 | 0.98 |
| Q99666   | RANBP2-like ;  | 0.00 | 0.00 | 1.38 | 2 | 0.98 | 1.18 | 0.95 | 1.14 | 0.86 |
| Q9BRA2   | Thioredoxin c  | 0.01 | 0.09 | 1.21 | 2 | 1.06 | 1.00 | 1.03 | 1.01 | 0.88 |
| Q9BRU9   | rRNA-process   | 0.03 | 0.14 | 1.34 | 2 | 0.94 | 1.00 | 0.97 | 1.07 | 0.80 |
| Q9BU64-1 | centromere p   | 0.00 | 0.02 | 1.21 | 2 | 1.10 | 1.14 | 0.95 | 1.14 | 0.95 |
| Q9BUR4   | Telomerase C   | 0.00 | 0.05 | 1.23 | 2 | 0.94 | 1.05 | 0.93 | 1.03 | 0.86 |
| Q9BV73-1 | Centrosome-    | 0.00 | 0.02 | 1.30 | 2 | 0.98 | 1.17 | 0.97 | 1.13 | 0.90 |
| Q9BVI4   | Nucleolar cor  | 0.00 | 0.01 | 1.24 | 2 | 0.97 | 1.03 | 0.91 | 1.09 | 0.88 |
| Q9BX70   | BTB/POZ don    | 0.03 | 0.16 | 1.29 | 2 | 1.08 | 1.00 | 1.12 | 1.15 | 0.89 |
| Q9BY12   | S phase cyclin | 0.03 | 0.16 | 1.47 | 2 | 0.63 | 0.93 | 0.86 | 0.81 | 0.68 |
| Q9BZX2   | Uridine-cytidi | 0.00 | 0.00 | 1.26 | 2 | 0.99 | 1.08 | 0.94 | 1.09 | 0.87 |
| Q9H0H0   | integrator coi | 0.00 | 0.02 | 1.24 | 2 | 0.91 | 0.99 | 0.93 | 0.93 | 0.80 |
| Q9H8M2   | Bromodomai     | 0.01 | 0.06 | 1.64 | 2 | 0.80 | 1.19 | 0.75 | 1.15 | 0.72 |
| Q9H981   | Actin-related  | 0.00 | 0.03 | 1.21 | 2 | 1.07 | 1.15 | 0.97 | 1.13 | 0.95 |
| Q9H9Q4-1 | non-homolog    | 0.00 | 0.01 | 1.26 | 2 | 0.98 | 1.21 | 0.96 | 1.08 | 0.96 |
| Q9HB09   | Bcl-2-like pro | 0.03 | 0.16 | 1.30 | 2 | 1.04 | 1.30 | 1.04 | 1.35 | 1.05 |
| Q9HC52   | Chromobox p    | 0.00 | 0.03 | 1.28 | 2 | 0.94 | 1.06 | 0.86 | 1.03 | 0.83 |
| Q9NNX1   | Tuftelin OS=H  | 0.00 | 0.03 | 1.54 | 2 | 0.96 | 1.09 | 0.92 | 1.16 | 0.76 |
| Q9NP66   | High mobility  | 0.04 | 0.18 | 1.39 | 2 | 1.00 | 1.01 | 0.87 | 1.13 | 0.81 |
| Q9NQX7   | Integral mem   | 0.01 | 0.07 | 1.44 | 2 | 0.78 | 1.12 | 0.87 | 1.10 | 0.82 |
| Q9NSJ2   | Protein FAM2   | 0.00 | 0.00 | 1.22 | 2 | 0.96 | 1.04 | 0.93 | 1.06 | 0.86 |
| Q9NV31   | U3 small nucl  | 0.00 | 0.04 | 1.23 | 2 | 0.93 | 1.11 | 0.93 | 1.10 | 0.90 |
| Q9NV92   | NEDD4 family   | 0.00 | 0.00 | 1.39 | 2 | 0.99 | 1.17 | 0.95 | 1.24 | 0.89 |
| Q9NVK5-1 | FGFR1 oncog    | 0.00 | 0.04 | 1.32 | 2 | 1.00 | 1.07 | 0.86 | 1.04 | 0.81 |
| Q9NWT1   | p21-activatec  | 0.00 | 0.01 | 1.32 | 2 | 0.98 | 1.14 | 0.91 | 1.07 | 0.86 |
| Q9NZM5   | Glioma tumo    | 0.05 | 0.19 | 1.31 | 2 | 0.91 | 0.96 | 0.92 | 1.10 | 0.84 |
| Q9P0M9   | 39S ribosom    | 0.00 | 0.04 | 1.31 | 2 | 0.99 | 0.95 | 0.95 | 0.92 | 0.76 |
| Q9P2X0   | Dolichol-pho   | 0.00 | 0.03 | 1.27 | 2 | 0.96 | 1.01 | 0.93 | 0.98 | 0.80 |
| Q9UBN7-1 | histone deacc  | 0.03 | 0.14 | 1.20 | 2 | 1.05 | 1.12 | 0.98 | 1.13 | 0.94 |
| Q9UGP4   | LIM domain-c   | 0.03 | 0.14 | 1.21 | 2 | 1.02 | 1.05 | 0.97 | 1.04 | 0.87 |
| Q9UHA3   | Probable ribc  | 0.04 | 0.18 | 1.35 | 2 | 0.97 | 1.05 | 0.90 | 1.19 | 0.88 |
| Q9UI30   | Multifunctio   | 0.00 | 0.01 | 1.27 | 2 | 0.99 | 1.09 | 0.95 | 1.05 | 0.85 |
| Q9UKD1   | Glucocorticoi  | 0.00 | 0.02 | 1.32 | 2 | 1.04 | 1.06 | 1.05 | 1.16 | 0.87 |
| Q9ULJ7   | Ankyrin repe   | 0.03 | 0.15 | 1.21 | 2 | 0.98 | 1.08 | 0.93 | 1.12 | 0.97 |
| Q9UNK0   | Syntaxin-8 O   | 0.02 | 0.12 | 1.22 | 2 | 1.02 | 1.06 | 0.93 | 1.02 | 0.87 |
| Q9UQ13   | Leucine-rich r | 0.01 | 0.08 | 1.27 | 2 | 0.88 | 0.95 | 0.91 | 0.93 | 0.74 |
| Q9Y2C4   | Nuclease EXC   | 0.00 | 0.00 | 1.37 | 2 | 0.92 | 1.11 | 0.93 | 1.03 | 0.81 |
| Q9Y3B1   | PRELI domair   | 0.02 | 0.10 | 1.92 | 2 | 0.94 | 1.40 | 0.88 | 1.10 | 0.73 |
| Q9Y3T6   | R3H and coile  | 0.03 | 0.15 | 1.23 | 2 | 1.08 | 1.02 | 1.06 | 1.18 | 0.96 |

| Accession | Description    | Anova | Anova.adj | MaxFC | Clusters | Means.C | Means.T1 | Means.T2 | Means.T3 | Means.T4 |
|-----------|----------------|-------|-----------|-------|----------|---------|----------|----------|----------|----------|
| O14618    | copper chape   | 0.00  | 0.00      | 1.24  | 3        | 1.01    | 0.91     | 1.13     | 0.96     | 1.03     |
| O14647    | Chromodom      | 0.03  | 0.13      | 1.29  | 3        | 1.02    | 0.79     | 1.01     | 0.88     | 0.97     |
| O14957    | cytochrome t   | 0.01  | 0.06      | 1.34  | 3        | 0.89    | 0.95     | 1.19     | 0.92     | 1.08     |
| O15063    | Uncharacteri   | 0.05  | 0.19      | 1.21  | 3        | 0.97    | 0.96     | 1.11     | 1.03     | 1.16     |
| O15126-1  | Secretory car  | 0.00  | 0.01      | 1.21  | 3        | 1.01    | 0.95     | 1.12     | 0.93     | 1.14     |
| O15382    | Branched-ch    | 0.00  | 0.01      | 1.21  | 3        | 0.99    | 0.89     | 1.07     | 0.89     | 1.02     |
| O43633    | Charged mult   | 0.00  | 0.00      | 1.25  | 3        | 1.00    | 0.87     | 1.02     | 0.88     | 1.09     |
| O43708    | maleylaceto    | 0.00  | 0.00      | 1.39  | 3        | 1.01    | 0.87     | 1.21     | 0.90     | 1.20     |
| O43759-2  | Isoform 1B of  | 0.00  | 0.02      | 1.23  | 3        | 0.98    | 0.86     | 1.06     | 0.93     | 1.00     |
| O43826-1  | Glucose-6-ph   | 0.01  | 0.06      | 1.27  | 3        | 0.95    | 0.84     | 1.06     | 0.92     | 1.00     |
| O43852-4  | Isoform 4 of ( | 0.00  | 0.00      | 1.71  | 3        | 1.07    | 0.94     | 1.30     | 0.99     | 1.61     |
| O60573    | Eukaryotic tr  | 0.01  | 0.07      | 1.24  | 3        | 0.99    | 0.96     | 1.12     | 0.91     | 1.11     |
| O60890    | Oligophrenin   | 0.00  | 0.02      | 1.36  | 3        | 1.03    | 0.84     | 1.05     | 0.88     | 1.15     |
| O75391    | Sperm-associ   | 0.00  | 0.01      | 1.26  | 3        | 1.00    | 0.86     | 1.04     | 0.91     | 1.08     |
| O94811    | Tubulin polyr  | 0.00  | 0.03      | 1.21  | 3        | 1.06    | 0.88     | 0.99     | 0.91     | 0.98     |
| O95218    | Zinc finger Ra | 0.00  | 0.01      | 1.36  | 3        | 1.01    | 0.89     | 1.10     | 0.95     | 1.22     |
| O95716    | ras-related pr | 0.00  | 0.02      | 1.26  | 3        | 1.02    | 0.97     | 1.09     | 0.92     | 1.16     |
| O96033    | Molybdopter    | 0.02  | 0.11      | 1.21  | 3        | 1.05    | 0.93     | 1.05     | 1.00     | 1.13     |
| P00505    | Aspartate am   | 0.05  | 0.19      | 1.22  | 3        | 1.05    | 0.90     | 1.11     | 0.91     | 1.02     |
| P01116    | GTPase KRas    | 0.03  | 0.14      | 1.28  | 3        | 1.04    | 0.86     | 1.10     | 0.97     | 1.07     |
| P04080    | Cystatin-B [O  | 0.01  | 0.07      | 1.36  | 3        | 1.00    | 0.79     | 0.97     | 0.85     | 1.07     |
| P05166    | Propionyl-Co   | 0.00  | 0.01      | 1.20  | 3        | 0.99    | 0.89     | 1.06     | 0.91     | 1.03     |
| P07311    | Acylphosphat   | 0.00  | 0.02      | 1.59  | 3        | 1.00    | 0.64     | 1.02     | 0.77     | 0.98     |
| P07339    | Cathepsin D [  | 0.02  | 0.11      | 1.27  | 3        | 1.04    | 0.82     | 0.98     | 0.95     | 0.99     |
| P07858    | Cathepsin B C  | 0.00  | 0.02      | 1.28  | 3        | 1.09    | 0.85     | 1.05     | 0.91     | 1.09     |
| P08648    | Integrin alph  | 0.01  | 0.09      | 1.23  | 3        | 1.02    | 0.88     | 1.08     | 0.95     | 1.04     |
| P08962    | CD63 antigen   | 0.00  | 0.02      | 1.23  | 3        | 0.94    | 0.79     | 0.97     | 0.89     | 0.90     |
| P09488    | Glutathione S  | 0.04  | 0.17      | 1.27  | 3        | 1.12    | 0.89     | 1.09     | 0.99     | 1.13     |
| P10109    | Adrenodoxin,   | 0.01  | 0.08      | 1.22  | 3        | 1.04    | 0.86     | 1.05     | 1.00     | 1.00     |
| P10599    | Thioredoxin C  | 0.00  | 0.01      | 1.60  | 3        | 1.00    | 0.62     | 0.95     | 0.84     | 0.92     |
| P11234    | Ras-related p  | 0.00  | 0.05      | 1.33  | 3        | 1.03    | 0.96     | 1.22     | 0.99     | 1.27     |
| P13473    | Lysosome-as    | 0.01  | 0.08      | 1.38  | 3        | 1.15    | 0.85     | 1.17     | 0.95     | 1.17     |
| P13640    | metallothioni  | 0.01  | 0.06      | 4.72  | 3        | 1.45    | 0.31     | 0.86     | 0.53     | 0.93     |
| P15154-1  | Ras-related C  | 0.00  | 0.04      | 1.23  | 3        | 1.04    | 0.93     | 1.15     | 0.97     | 1.12     |
| P17900    | Ganglioside C  | 0.01  | 0.09      | 1.73  | 3        | 1.19    | 0.69     | 0.91     | 0.80     | 1.01     |
| P21397    | Amine oxidas   | 0.00  | 0.02      | 1.21  | 3        | 0.98    | 0.92     | 1.00     | 1.00     | 1.10     |
| P26583    | High mobility  | 0.01  | 0.07      | 1.46  | 3        | 0.99    | 0.67     | 0.92     | 0.71     | 0.95     |
| P29218    | Inositol monc  | 0.01  | 0.08      | 1.26  | 3        | 1.05    | 0.85     | 1.05     | 0.92     | 1.07     |
| P29373    | Cellular retin | 0.00  | 0.00      | 1.26  | 3        | 1.02    | 0.84     | 1.07     | 0.88     | 1.04     |
| P30086    | Phosphatidyl   | 0.01  | 0.07      | 1.28  | 3        | 1.02    | 0.81     | 1.02     | 0.93     | 1.03     |
| P30740    | Leukocyte el   | 0.00  | 0.04      | 1.46  | 3        | 1.07    | 0.79     | 0.93     | 0.90     | 1.15     |
| P31949    | protein S100-  | 0.03  | 0.15      | 1.22  | 3        | 0.96    | 0.90     | 1.11     | 0.93     | 1.06     |
| P32322    | Pyrroline-5-c  | 0.00  | 0.01      | 1.20  | 3        | 0.99    | 0.84     | 1.01     | 0.87     | 0.93     |
| P35580    | Myosin-10 O'   | 0.00  | 0.02      | 1.24  | 3        | 0.99    | 0.80     | 0.95     | 0.82     | 0.95     |
| P35754    | Glutaredoxin   | 0.02  | 0.11      | 1.29  | 3        | 1.12    | 0.90     | 1.11     | 0.97     | 1.17     |
| P35813    | Protein phosq  | 0.00  | 0.01      | 1.22  | 3        | 1.01    | 0.85     | 1.02     | 0.93     | 1.04     |
| P37235    | Hippocalcin-li | 0.00  | 0.05      | 1.94  | 3        | 1.09    | 0.56     | 0.93     | 0.81     | 0.88     |
| P40121    | Macrophage-    | 0.02  | 0.10      | 1.21  | 3        | 1.02    | 0.98     | 1.12     | 1.02     | 1.19     |
| P41236    | Protein phosq  | 0.02  | 0.13      | 1.25  | 3        | 1.02    | 0.90     | 1.13     | 0.96     | 1.08     |
| P42025    | Beta-contract  | 0.02  | 0.11      | 1.20  | 3        | 1.00    | 0.92     | 1.09     | 0.96     | 1.10     |
| P48509    | CD151 antige   | 0.02  | 0.12      | 1.35  | 3        | 1.14    | 0.86     | 1.12     | 0.85     | 1.09     |
| P49366    | Deoxyhypusir   | 0.01  | 0.07      | 1.20  | 3        | 1.04    | 0.93     | 1.08     | 0.90     | 1.04     |
| P51149    | Ras-related p  | 0.02  | 0.11      | 1.26  | 3        | 1.01    | 0.90     | 1.11     | 0.88     | 1.03     |
| P53985    | Monocarboxy    | 0.00  | 0.01      | 1.36  | 3        | 1.00    | 0.93     | 1.17     | 0.98     | 1.26     |
| P54252    | Ataxin-3 OS=l  | 0.00  | 0.00      | 1.22  | 3        | 1.02    | 0.88     | 1.05     | 0.92     | 1.07     |
| P55263    | Adenosine kii  | 0.01  | 0.10      | 1.20  | 3        | 0.99    | 0.94     | 1.13     | 0.99     | 1.04     |
| P60059    | Protein trans  | 0.00  | 0.03      | 1.30  | 3        | 1.01    | 0.89     | 1.15     | 1.01     | 1.08     |
| P60520    | Gamma-amir     | 0.00  | 0.02      | 1.22  | 3        | 1.02    | 0.91     | 1.06     | 0.98     | 1.11     |
| P61026    | ras-related pr | 0.00  | 0.01      | 1.20  | 3        | 1.01    | 0.89     | 1.07     | 0.91     | 1.07     |
| P61803    | Dolichyl-diph  | 0.00  | 0.04      | 1.27  | 3        | 1.09    | 0.86     | 1.09     | 1.01     | 1.02     |
| P61916    | NPC intracell  | 0.04  | 0.16      | 1.98  | 3        | 1.22    | 0.62     | 0.97     | 0.79     | 0.97     |
| P61927    | 60S ribosoma   | 0.05  | 0.18      | 1.23  | 3        | 1.01    | 0.82     | 1.00     | 0.96     | 0.98     |
| P61956    | small ubiquiti | 0.00  | 0.02      | 1.32  | 3        | 1.11    | 0.90     | 1.07     | 0.96     | 1.19     |
| P62745    | Rho-related C  | 0.04  | 0.18      | 1.31  | 3        | 1.15    | 0.88     | 1.04     | 0.94     | 1.04     |
| P62820    | Ras-related p  | 0.00  | 0.03      | 1.21  | 3        | 1.03    | 0.97     | 1.11     | 0.98     | 1.17     |
| P62834    | ras-related pr | 0.00  | 0.02      | 1.60  | 3        | 1.08    | 0.82     | 1.25     | 0.79     | 1.26     |
| P68402    | Platelet-activ | 0.03  | 0.15      | 1.29  | 3        | 1.07    | 0.99     | 1.22     | 1.01     | 1.28     |
| P83876    | thioredoxin-li | 0.00  | 0.03      | 1.24  | 3        | 1.03    | 0.87     | 1.07     | 0.96     | 1.04     |
| Q01469    | Fatty acid-bir | 0.02  | 0.11      | 1.26  | 3        | 0.97    | 0.94     | 1.19     | 0.98     | 1.12     |
| Q04760    | Lactoylglutat  | 0.01  | 0.06      | 1.21  | 3        | 1.03    | 0.86     | 1.04     | 0.93     | 0.99     |
| Q08722    | Leukocyte su   | 0.00  | 0.00      | 1.24  | 3        | 1.06    | 0.93     | 1.11     | 0.94     | 1.15     |
| Q13011    | Delta(3,5)-De  | 0.00  | 0.02      | 1.27  | 3        | 1.02    | 0.81     | 1.02     | 0.91     | 0.95     |

|          |                |      |      |      |   |      |      |      |      |      |
|----------|----------------|------|------|------|---|------|------|------|------|------|
| Q13123   | Protein Red [  | 0.04 | 0.16 | 1.20 | 3 | 0.97 | 0.90 | 1.01 | 0.97 | 1.08 |
| Q13162   | Peroxioredoxir | 0.00 | 0.04 | 1.50 | 3 | 1.10 | 0.74 | 0.93 | 0.85 | 0.99 |
| Q13491-4 | Isoform 4 of f | 0.01 | 0.10 | 1.23 | 3 | 1.02 | 0.88 | 1.08 | 0.89 | 1.01 |
| Q13510   | Acid ceramid   | 0.00 | 0.03 | 1.26 | 3 | 1.01 | 0.83 | 1.02 | 0.94 | 1.05 |
| Q13795   | ADP-ribosylat  | 0.01 | 0.06 | 1.24 | 3 | 0.98 | 0.90 | 1.05 | 0.94 | 1.12 |
| Q15181   | Inorganic pyr  | 0.00 | 0.01 | 1.41 | 3 | 1.02 | 0.73 | 1.02 | 0.93 | 0.98 |
| Q15208   | Serine/threor  | 0.01 | 0.10 | 1.21 | 3 | 1.06 | 1.01 | 1.12 | 1.04 | 1.22 |
| Q15274   | nicotinate-nu  | 0.00 | 0.00 | 1.40 | 3 | 1.02 | 0.79 | 1.10 | 0.83 | 1.04 |
| Q16637   | Survival motc  | 0.00 | 0.01 | 1.20 | 3 | 1.00 | 0.91 | 1.08 | 0.96 | 1.10 |
| Q3ZAQ7   | Vacuolar ATP   | 0.00 | 0.04 | 1.43 | 3 | 1.12 | 0.78 | 0.97 | 0.88 | 1.03 |
| Q4VCS5   | Angiomotin C   | 0.00 | 0.01 | 1.24 | 3 | 0.94 | 0.84 | 1.04 | 0.87 | 0.95 |
| Q53EL6   | Programmed     | 0.00 | 0.00 | 1.26 | 3 | 1.01 | 0.84 | 1.06 | 0.84 | 1.01 |
| Q5T2R2   | Decaprenyl-d   | 0.03 | 0.14 | 2.08 | 3 | 1.14 | 0.60 | 1.24 | 0.97 | 1.06 |
| Q6FIF0   | AN1-type zini  | 0.03 | 0.15 | 1.21 | 3 | 1.09 | 0.90 | 1.07 | 0.94 | 1.04 |
| Q6JQN1   | Acyl-CoA deh   | 0.03 | 0.14 | 1.36 | 3 | 0.96 | 0.79 | 1.08 | 0.99 | 1.03 |
| Q6P1N0   | Coiled-coil an | 0.03 | 0.15 | 1.26 | 3 | 0.95 | 0.83 | 1.00 | 0.89 | 1.05 |
| Q6P587-1 | Acylpyruvase   | 0.01 | 0.10 | 1.29 | 3 | 1.02 | 0.79 | 1.01 | 0.89 | 1.02 |
| Q6PI78   | Transmembr:    | 0.00 | 0.02 | 1.26 | 3 | 0.98 | 0.92 | 1.08 | 1.01 | 1.16 |
| Q6PID6   | Tetratricopep  | 0.00 | 0.03 | 1.22 | 3 | 1.03 | 0.99 | 1.10 | 0.98 | 1.20 |
| Q6UB99   | Ankyrin repe:  | 0.03 | 0.15 | 1.30 | 3 | 0.90 | 0.95 | 1.07 | 0.97 | 1.17 |
| Q6UW68   | Transmembr:    | 0.00 | 0.03 | 1.27 | 3 | 1.04 | 0.89 | 1.12 | 0.97 | 1.13 |
| Q6UXH1-5 | Isoform 5 of ( | 0.02 | 0.12 | 1.30 | 3 | 1.03 | 0.84 | 1.05 | 0.94 | 1.09 |
| Q7L592   | NADH dehydi    | 0.00 | 0.00 | 1.24 | 3 | 0.99 | 0.85 | 1.05 | 0.88 | 1.01 |
| Q7Z4V5   | Hepatoma-dc    | 0.01 | 0.08 | 1.32 | 3 | 1.04 | 0.98 | 1.29 | 1.02 | 1.21 |
| Q86V88   | Magnesium-c    | 0.03 | 0.14 | 1.27 | 3 | 1.03 | 0.94 | 1.19 | 0.97 | 1.09 |
| Q86VM9   | Zinc finger CC | 0.00 | 0.03 | 1.38 | 3 | 0.93 | 0.86 | 1.18 | 0.86 | 1.06 |
| Q86WA6   | Valacyclovir t | 0.01 | 0.05 | 1.24 | 3 | 1.03 | 0.85 | 1.00 | 0.88 | 1.04 |
| Q8IWB9   | Testis-expres  | 0.02 | 0.13 | 1.21 | 3 | 1.01 | 0.88 | 1.02 | 0.92 | 1.07 |
| Q8IYS1   | Peptidase Mz   | 0.00 | 0.02 | 1.26 | 3 | 0.94 | 0.89 | 1.12 | 0.92 | 1.00 |
| Q8N1G0   | Zinc finger pr | 0.04 | 0.18 | 1.22 | 3 | 0.98 | 0.86 | 1.03 | 0.91 | 1.05 |
| Q8N2U0   | Transmembr:    | 0.00 | 0.04 | 1.36 | 3 | 0.97 | 0.83 | 1.13 | 0.93 | 1.10 |
| Q8ND24   | RING finger p  | 0.00 | 0.02 | 1.20 | 3 | 1.02 | 0.89 | 1.03 | 0.95 | 1.07 |
| Q8NHP8   | Putative phos  | 0.01 | 0.07 | 1.21 | 3 | 1.08 | 0.90 | 0.98 | 0.92 | 1.07 |
| Q8NI22   | Multiple coag  | 0.01 | 0.06 | 1.42 | 3 | 0.93 | 0.89 | 1.27 | 0.99 | 1.26 |
| Q8TBP6   | Solute carrier | 0.00 | 0.03 | 1.30 | 3 | 1.10 | 0.85 | 1.03 | 1.02 | 1.03 |
| Q8TEA8   | D-tyrosyl-tRN  | 0.00 | 0.03 | 1.58 | 3 | 1.07 | 0.68 | 1.04 | 0.91 | 0.94 |
| Q8WYN0   | Cysteine prot  | 0.01 | 0.06 | 1.39 | 3 | 0.96 | 0.88 | 1.22 | 0.94 | 1.12 |
| Q92551   | Inositol hexal | 0.03 | 0.13 | 1.24 | 3 | 1.04 | 0.91 | 1.09 | 0.98 | 1.13 |
| Q92820   | Gamma-gluta    | 0.00 | 0.00 | 1.28 | 3 | 1.00 | 0.85 | 1.08 | 0.89 | 1.06 |
| Q96A54   | Adiponectin r  | 0.03 | 0.14 | 1.28 | 3 | 0.94 | 0.89 | 1.15 | 0.95 | 1.14 |
| Q96AT9   | Ribulose-pho   | 0.00 | 0.05 | 1.35 | 3 | 1.09 | 0.80 | 1.03 | 0.86 | 0.98 |
| Q96BM9   | ADP-ribosylat  | 0.02 | 0.11 | 1.30 | 3 | 1.03 | 1.07 | 1.24 | 0.97 | 1.26 |
| Q96C19   | EF-hand dom    | 0.00 | 0.01 | 1.27 | 3 | 0.97 | 0.88 | 1.12 | 0.95 | 1.06 |
| Q96C36   | Proline-5-c:   | 0.00 | 0.01 | 1.22 | 3 | 0.98 | 0.86 | 1.05 | 0.87 | 0.98 |
| Q96CW6   | Probable RNz   | 0.01 | 0.06 | 1.22 | 3 | 1.06 | 0.87 | 1.01 | 0.95 | 0.95 |
| Q96DA6   | mitochondria   | 0.00 | 0.03 | 1.25 | 3 | 0.94 | 0.87 | 1.09 | 0.95 | 1.01 |
| Q96DP5   | Methionyl-tR   | 0.00 | 0.05 | 1.29 | 3 | 1.04 | 0.82 | 1.04 | 0.88 | 1.05 |
| Q96MW1   | Coiled-coil dc | 0.00 | 0.01 | 1.21 | 3 | 1.06 | 0.94 | 1.04 | 1.02 | 1.14 |
| Q99442   | Translocation  | 0.01 | 0.08 | 1.24 | 3 | 1.02 | 0.92 | 1.06 | 0.92 | 1.14 |
| Q99576-3 | Isoform 2 of [ | 0.00 | 0.03 | 1.23 | 3 | 1.03 | 0.88 | 1.09 | 0.94 | 1.09 |
| Q99807-1 | 5-demethoxy    | 0.00 | 0.01 | 1.39 | 3 | 1.04 | 0.92 | 1.11 | 0.92 | 1.28 |
| Q99816   | Tumor suscep   | 0.00 | 0.00 | 1.20 | 3 | 1.01 | 0.90 | 1.08 | 0.92 | 1.08 |
| Q99829   | Copine-1 OS=   | 0.00 | 0.02 | 1.25 | 3 | 1.03 | 0.90 | 1.10 | 0.93 | 1.13 |
| Q99856   | AT-rich interz | 0.00 | 0.04 | 1.23 | 3 | 1.05 | 0.93 | 1.12 | 0.95 | 1.15 |
| Q9BUE0   | Mediator of f  | 0.00 | 0.01 | 1.43 | 3 | 1.01 | 0.92 | 1.27 | 0.94 | 1.31 |
| Q9BUL8   | programmed     | 0.00 | 0.02 | 1.23 | 3 | 0.98 | 0.88 | 1.08 | 0.89 | 1.03 |
| Q9BV79   | Enoyl-[acyl-c: | 0.00 | 0.01 | 1.28 | 3 | 0.99 | 0.88 | 1.13 | 0.92 | 1.09 |
| Q9BWH2   | FUN14 doma     | 0.00 | 0.02 | 1.21 | 3 | 1.09 | 0.99 | 1.20 | 1.00 | 1.17 |
| Q9GZT9-1 | Egl nine hom   | 0.00 | 0.03 | 1.28 | 3 | 1.02 | 0.80 | 0.96 | 0.88 | 1.03 |
| Q9H063   | repressor of f | 0.00 | 0.04 | 1.20 | 3 | 1.00 | 0.92 | 1.09 | 1.05 | 1.10 |
| Q9H0W9   | Ester hydrola  | 0.00 | 0.00 | 1.60 | 3 | 1.10 | 0.72 | 1.14 | 0.91 | 1.12 |
| Q9H3K2   | Growth horr    | 0.00 | 0.03 | 1.30 | 3 | 1.09 | 0.84 | 1.06 | 0.91 | 0.98 |
| Q9H5H4   | Zinc finger pr | 0.00 | 0.01 | 1.24 | 3 | 1.01 | 0.82 | 0.99 | 0.87 | 0.98 |
| Q9H6K1   | Uncharacteri:  | 0.04 | 0.17 | 1.27 | 3 | 0.76 | 0.75 | 0.89 | 0.95 | 0.86 |
| Q9H7C9-1 | Mth938 dom     | 0.00 | 0.01 | 1.29 | 3 | 1.06 | 0.89 | 1.15 | 0.96 | 1.13 |
| Q9H920   | RING finger p  | 0.02 | 0.12 | 1.42 | 3 | 0.79 | 0.85 | 1.12 | 1.02 | 1.01 |
| Q9HBK9   | Arsenite metl  | 0.00 | 0.02 | 1.34 | 3 | 1.02 | 0.85 | 1.14 | 0.96 | 1.10 |
| Q9NPJ3   | Acyl-coenzyn   | 0.00 | 0.01 | 1.29 | 3 | 0.97 | 0.86 | 1.08 | 0.91 | 1.10 |
| Q9NUD5   | Zinc finger CC | 0.00 | 0.05 | 1.30 | 3 | 1.08 | 0.83 | 0.93 | 0.92 | 0.94 |
| Q9NVE7   | pantothenate   | 0.00 | 0.00 | 1.20 | 3 | 1.03 | 0.87 | 1.01 | 0.92 | 1.05 |
| Q9NVJ2   | ADP-ribosylat  | 0.03 | 0.16 | 1.22 | 3 | 1.01 | 0.92 | 1.13 | 0.94 | 1.10 |
| Q9NZU5   | LIM and cyste  | 0.00 | 0.03 | 1.20 | 3 | 0.95 | 0.86 | 1.03 | 0.89 | 0.99 |
| Q9P2K2   | Thioredoxin c  | 0.05 | 0.19 | 1.28 | 3 | 0.95 | 0.92 | 0.97 | 0.85 | 1.09 |

|          |                 |      |      |      |   |      |      |      |      |      |
|----------|-----------------|------|------|------|---|------|------|------|------|------|
| Q9UBI6   | Guanine nucl    | 0.03 | 0.15 | 1.26 | 3 | 0.90 | 0.98 | 1.13 | 0.91 | 1.09 |
| Q9UEG4   | Zinc finger pr  | 0.05 | 0.19 | 1.23 | 3 | 1.06 | 0.86 | 0.94 | 0.89 | 1.06 |
| Q9UKJ3-1 | G patch dom:    | 0.04 | 0.16 | 1.21 | 3 | 0.98 | 0.88 | 1.06 | 0.95 | 1.04 |
| Q9Y232-1 | Chromodom:      | 0.00 | 0.01 | 1.57 | 3 | 1.08 | 0.84 | 1.22 | 0.90 | 1.32 |
| Q9Y2Q3-1 | Glutathione S   | 0.00 | 0.03 | 1.21 | 3 | 0.96 | 1.03 | 1.14 | 1.03 | 1.16 |
| Q9Y3D6   | Mitochondria    | 0.00 | 0.00 | 1.25 | 3 | 0.96 | 0.90 | 1.12 | 0.98 | 1.00 |
| Q9Y467   | sal-like protei | 0.00 | 0.04 | 1.22 | 3 | 1.12 | 0.92 | 1.06 | 0.99 | 1.06 |
| Q9Y4E5   | E3 SUMO-prc     | 0.02 | 0.13 | 1.26 | 3 | 1.03 | 0.86 | 1.08 | 0.92 | 1.09 |
| Q9Y6B6   | GTP-binding j   | 0.00 | 0.01 | 1.22 | 3 | 0.99 | 0.86 | 1.04 | 0.90 | 1.03 |

| Accession | Description    | Anova | Anova.adj | MaxFC | Clusters | Means.C | Means.T1 | Means.T2 | Means.T3 | Means.T4 |
|-----------|----------------|-------|-----------|-------|----------|---------|----------|----------|----------|----------|
| O14657    | Torsin-1B [OS  | 0.03  | 0.15      | 1.36  | 4        | 1.11    | 1.43     | 1.05     | 1.26     | 1.26     |
| O15392    | Baculoviral IA | 0.05  | 0.18      | 1.27  | 4        | 1.08    | 1.25     | 1.03     | 1.07     | 0.98     |
| O43164    | E3 ubiquitin-γ | 0.00  | 0.02      | 1.27  | 4        | 0.97    | 1.10     | 0.87     | 1.04     | 0.92     |
| O43174    | Cytochrome l   | 0.00  | 0.01      | 1.27  | 4        | 1.02    | 1.23     | 0.97     | 1.15     | 1.05     |
| O43482    | Protein Mis1   | 0.00  | 0.00      | 1.30  | 4        | 0.97    | 1.24     | 0.95     | 1.02     | 0.96     |
| O60318    | Germinal-cen   | 0.02  | 0.12      | 1.21  | 4        | 0.94    | 1.13     | 0.94     | 1.07     | 0.96     |
| O60869    | Endothelial d  | 0.01  | 0.06      | 1.41  | 4        | 0.94    | 1.29     | 1.03     | 0.91     | 1.03     |
| O75063    | Glycosaminoq   | 0.00  | 0.02      | 1.41  | 4        | 1.06    | 1.32     | 0.93     | 1.08     | 1.04     |
| O75150    | E3 ubiquitin-γ | 0.00  | 0.04      | 1.22  | 4        | 1.01    | 1.21     | 0.99     | 1.06     | 1.03     |
| O75386    | Tubby-relate   | 0.03  | 0.16      | 1.38  | 4        | 0.98    | 1.22     | 0.88     | 1.02     | 1.08     |
| O75676    | Ribosomal pr   | 0.00  | 0.05      | 1.43  | 4        | 1.00    | 1.18     | 0.82     | 1.11     | 0.86     |
| O75915    | PRA1 family γ  | 0.01  | 0.09      | 1.21  | 4        | 1.03    | 1.12     | 0.98     | 1.00     | 0.93     |
| O94889    | Kelch-like prc | 0.01  | 0.07      | 1.39  | 4        | 0.95    | 1.22     | 0.96     | 1.11     | 0.88     |
| O95140    | Mitofusin-2 C  | 0.00  | 0.02      | 1.22  | 4        | 1.00    | 1.15     | 0.94     | 1.08     | 0.94     |
| O95685    | Protein phosγ  | 0.01  | 0.06      | 1.32  | 4        | 1.06    | 1.25     | 1.05     | 1.14     | 0.94     |
| P00488    | Coagulation f  | 0.03  | 0.14      | 1.68  | 4        | 1.17    | 1.53     | 0.91     | 1.14     | 1.11     |
| P00734    | Prothrombin    | 0.00  | 0.01      | 1.81  | 4        | 0.99    | 1.52     | 0.84     | 1.13     | 0.93     |
| P00747    | Plasminogen    | 0.00  | 0.02      | 1.90  | 4        | 1.00    | 1.53     | 0.80     | 1.07     | 0.92     |
| P01008    | Antithrombin   | 0.01  | 0.06      | 1.73  | 4        | 1.05    | 1.48     | 0.85     | 1.09     | 1.01     |
| P01023    | Alpha-2-macr   | 0.00  | 0.02      | 1.84  | 4        | 1.02    | 1.49     | 0.81     | 1.06     | 0.84     |
| P01024    | Complement     | 0.00  | 0.02      | 1.79  | 4        | 1.02    | 1.50     | 0.84     | 1.09     | 0.89     |
| P01033    | Metalloprote   | 0.01  | 0.09      | 1.34  | 4        | 0.94    | 1.13     | 0.84     | 0.96     | 0.90     |
| P02042    | Hemoglobin ε   | 0.00  | 0.03      | 1.44  | 4        | 0.97    | 1.21     | 0.92     | 1.17     | 0.84     |
| P02452    | Collagen alph  | 0.01  | 0.08      | 2.22  | 4        | 1.10    | 1.78     | 0.80     | 1.05     | 1.04     |
| P02461    | Collagen alph  | 0.00  | 0.03      | 1.72  | 4        | 0.98    | 1.51     | 0.88     | 1.10     | 0.89     |
| P02649    | Apolipoprote   | 0.02  | 0.12      | 1.52  | 4        | 1.00    | 1.38     | 0.91     | 1.03     | 0.94     |
| P02656    | Apolipoprote   | 0.00  | 0.02      | 1.60  | 4        | 0.99    | 1.40     | 0.87     | 1.36     | 0.97     |
| P02748    | complement     | 0.00  | 0.01      | 2.07  | 4        | 0.99    | 1.61     | 0.78     | 1.15     | 0.79     |
| P02751    | fibronectin [C | 0.00  | 0.02      | 1.56  | 4        | 1.01    | 1.36     | 0.87     | 1.04     | 0.87     |
| P02753    | Retinol-bindii | 0.00  | 0.04      | 1.75  | 4        | 1.07    | 1.47     | 0.84     | 1.08     | 0.93     |
| P02768    | Serum album    | 0.00  | 0.03      | 2.33  | 4        | 1.16    | 1.66     | 0.71     | 1.13     | 0.84     |
| P02771    | Alpha-fetopr   | 0.00  | 0.02      | 1.90  | 4        | 1.04    | 1.58     | 0.83     | 1.15     | 0.91     |
| P02787    | Serotransferr  | 0.00  | 0.04      | 1.91  | 4        | 0.97    | 1.53     | 0.80     | 1.07     | 0.85     |
| P02788    | Lactotransfer  | 0.01  | 0.06      | 1.86  | 4        | 1.21    | 1.47     | 0.79     | 1.00     | 0.87     |
| P04004    | Vitronectin [C | 0.00  | 0.01      | 1.57  | 4        | 1.01    | 1.48     | 0.94     | 1.16     | 0.99     |
| P04114    | apolipoprotei  | 0.00  | 0.00      | 1.78  | 4        | 1.03    | 1.50     | 0.84     | 1.22     | 0.88     |
| P04278-1  | Sex hormone    | 0.00  | 0.05      | 1.89  | 4        | 1.05    | 1.60     | 0.84     | 1.09     | 0.98     |
| P04745    | Alpha-amylas   | 0.02  | 0.12      | 1.88  | 4        | 0.99    | 1.50     | 0.80     | 1.08     | 0.89     |
| P05156    | Complement     | 0.00  | 0.02      | 1.92  | 4        | 1.11    | 1.39     | 0.72     | 1.01     | 0.83     |
| P05452    | Tetranectin C  | 0.00  | 0.05      | 1.79  | 4        | 0.99    | 1.51     | 0.86     | 1.11     | 0.84     |
| P05543    | thyroxine-bin  | 0.01  | 0.07      | 1.59  | 4        | 1.00    | 1.48     | 0.93     | 1.04     | 0.98     |
| P05546    | Heparin cofac  | 0.01  | 0.09      | 2.35  | 4        | 1.24    | 1.85     | 0.79     | 1.19     | 0.82     |
| P06396    | Gelsolin OS=†  | 0.00  | 0.04      | 1.50  | 4        | 1.04    | 1.36     | 0.90     | 1.07     | 0.93     |
| P07358    | Complement     | 0.00  | 0.01      | 2.25  | 4        | 1.07    | 1.76     | 0.79     | 1.26     | 1.01     |
| P07996    | thrombospor    | 0.00  | 0.03      | 1.84  | 4        | 1.05    | 1.47     | 0.80     | 1.07     | 0.88     |
| P08123    | Collagen alph  | 0.03  | 0.14      | 1.82  | 4        | 1.12    | 1.66     | 0.91     | 1.14     | 1.11     |
| P09234    | U1 small nucl  | 0.02  | 0.11      | 1.42  | 4        | 1.06    | 1.30     | 0.91     | 1.10     | 1.07     |
| P09486    | SPARC OS=Hc    | 0.00  | 0.05      | 1.37  | 4        | 0.98    | 1.20     | 0.88     | 0.96     | 0.94     |
| P0C0L4-1  | Complement     | 0.00  | 0.00      | 1.77  | 4        | 1.01    | 1.52     | 0.86     | 1.09     | 0.88     |
| P10643    | Complement     | 0.00  | 0.05      | 1.94  | 4        | 0.96    | 1.52     | 0.78     | 1.01     | 0.85     |
| P12109    | Collagen alph  | 0.00  | 0.05      | 1.22  | 4        | 0.99    | 1.17     | 0.96     | 1.01     | 0.96     |
| P12111    | Collagen alph  | 0.05  | 0.19      | 1.32  | 4        | 1.00    | 1.27     | 0.97     | 1.11     | 0.99     |
| P12259    | Coagulation f  | 0.00  | 0.02      | 1.49  | 4        | 0.98    | 1.31     | 0.88     | 1.05     | 0.93     |
| P13645    | Keratin, type  | 0.01  | 0.10      | 1.77  | 4        | 1.02    | 1.54     | 0.87     | 1.14     | 0.95     |
| P13647    | Keratin, type  | 0.02  | 0.12      | 1.84  | 4        | 1.03    | 1.57     | 0.85     | 1.17     | 1.10     |
| P14373    | Zinc finger pr | 0.02  | 0.11      | 1.22  | 4        | 0.87    | 1.05     | 0.91     | 0.94     | 0.87     |
| P14927    | Cytochrome l   | 0.04  | 0.18      | 1.53  | 4        | 0.88    | 1.31     | 1.11     | 1.12     | 1.34     |
| P15169    | Carboxypepti   | 0.01  | 0.07      | 1.71  | 4        | 1.00    | 1.43     | 0.84     | 1.21     | 0.97     |
| P18440    | Arylamine N-   | 0.01  | 0.07      | 1.26  | 4        | 1.04    | 1.20     | 0.96     | 1.09     | 0.99     |
| P18615    | Negative elor  | 0.03  | 0.15      | 1.22  | 4        | 1.00    | 1.16     | 0.95     | 1.05     | 0.97     |
| P19823    | Inter-alpha-tr | 0.00  | 0.01      | 1.92  | 4        | 1.03    | 1.56     | 0.81     | 1.06     | 0.89     |
| P19827    | Inter-alpha-tr | 0.01  | 0.09      | 1.89  | 4        | 1.00    | 1.52     | 0.81     | 1.04     | 0.81     |
| P20248    | Cyclin-A2 [OS  | 0.01  | 0.07      | 1.27  | 4        | 1.03    | 1.16     | 0.91     | 1.07     | 0.95     |
| P20742    | Pregnancy zo   | 0.00  | 0.02      | 1.79  | 4        | 0.99    | 1.57     | 0.88     | 1.14     | 0.89     |
| P20908    | Collagen alph  | 0.00  | 0.05      | 1.78  | 4        | 1.02    | 1.54     | 0.87     | 1.11     | 0.94     |
| P23142    | Fibulin-1 [OS  | 0.00  | 0.03      | 1.64  | 4        | 0.99    | 1.41     | 0.86     | 1.11     | 0.88     |
| P35443    | Thrombospor    | 0.00  | 0.01      | 1.79  | 4        | 1.02    | 1.46     | 0.82     | 1.12     | 0.87     |
| P36955    | Pigment epitl  | 0.01  | 0.09      | 1.41  | 4        | 1.00    | 1.28     | 0.90     | 0.98     | 0.91     |
| P40189    | Interleukin-6  | 0.03  | 0.16      | 1.31  | 4        | 0.94    | 1.23     | 1.03     | 1.08     | 1.07     |
| P42575-1  | caspase-2 [O   | 0.01  | 0.07      | 1.27  | 4        | 1.01    | 1.15     | 0.91     | 1.15     | 0.98     |
| P49747    | Cartilage olig | 0.00  | 0.02      | 2.00  | 4        | 1.02    | 1.56     | 0.78     | 1.09     | 0.83     |
| P51530    | DNA replicati  | 0.00  | 0.05      | 1.24  | 4        | 0.97    | 1.14     | 0.93     | 1.05     | 0.94     |

|          |                        |      |      |      |   |      |      |      |      |      |
|----------|------------------------|------|------|------|---|------|------|------|------|------|
| P51884   | Lumican OS=            | 0.01 | 0.06 | 1.60 | 4 | 1.05 | 1.40 | 0.88 | 1.05 | 0.92 |
| P62877   | E3 ubiquitin- $\gamma$ | 0.00 | 0.02 | 1.73 | 4 | 1.11 | 1.05 | 0.64 | 0.94 | 0.84 |
| P62942   | Peptidyl-proh          | 0.01 | 0.10 | 1.25 | 4 | 1.00 | 1.12 | 0.93 | 1.03 | 0.90 |
| P69905   | Hemoglobin $\delta$    | 0.01 | 0.10 | 1.33 | 4 | 1.07 | 1.22 | 0.92 | 1.12 | 1.02 |
| P82921   | 28S ribosoma           | 0.02 | 0.11 | 1.21 | 4 | 1.04 | 1.15 | 0.95 | 1.07 | 1.01 |
| P98179   | RNA-binding            | 0.01 | 0.08 | 1.30 | 4 | 0.98 | 1.14 | 0.87 | 1.11 | 0.90 |
| Q02818   | Nucleobindin           | 0.02 | 0.11 | 1.22 | 4 | 1.01 | 1.16 | 0.95 | 1.09 | 0.99 |
| Q03692   | Collagen alph          | 0.00 | 0.05 | 1.55 | 4 | 0.99 | 1.28 | 0.82 | 1.03 | 0.95 |
| Q04756   | Hepatocyte g           | 0.01 | 0.10 | 1.60 | 4 | 1.07 | 1.47 | 0.92 | 1.09 | 1.06 |
| Q05048   | Cleavage stir          | 0.00 | 0.05 | 1.21 | 4 | 0.96 | 1.07 | 0.93 | 1.03 | 0.89 |
| Q06033-1 | Inter-alpha-tr         | 0.00 | 0.01 | 2.06 | 4 | 0.99 | 1.55 | 0.75 | 1.09 | 0.82 |
| Q06587   | E3 ubiquitin- $\gamma$ | 0.00 | 0.01 | 1.36 | 4 | 0.94 | 1.21 | 0.92 | 1.09 | 0.89 |
| Q12805   | EGF-containin          | 0.00 | 0.03 | 1.68 | 4 | 1.05 | 1.44 | 0.91 | 1.12 | 0.86 |
| Q12834   | cell division c        | 0.00 | 0.03 | 1.30 | 4 | 0.95 | 1.05 | 0.82 | 1.01 | 0.81 |
| Q12860   | Contactin-1 C          | 0.04 | 0.18 | 1.25 | 4 | 1.00 | 1.17 | 0.93 | 0.98 | 0.97 |
| Q13243   | Serine/arginin         | 0.00 | 0.02 | 1.27 | 4 | 0.98 | 1.14 | 0.90 | 1.08 | 0.92 |
| Q13501-1 | sequestosom            | 0.00 | 0.01 | 1.27 | 4 | 1.01 | 1.14 | 0.90 | 1.08 | 0.96 |
| Q14457   | Beclin-1 OS=           | 0.05 | 0.19 | 1.36 | 4 | 1.02 | 1.24 | 0.91 | 1.04 | 1.01 |
| Q14554   | Protein disulf         | 0.01 | 0.05 | 1.21 | 4 | 0.91 | 1.03 | 0.87 | 0.88 | 1.05 |
| Q147X3   | N-alpha-acet           | 0.02 | 0.10 | 1.22 | 4 | 0.94 | 1.13 | 0.92 | 1.05 | 0.93 |
| Q14849-1 | StAR-related           | 0.00 | 0.04 | 1.52 | 4 | 1.03 | 1.55 | 1.02 | 1.07 | 1.02 |
| Q15058   | Kinesin-like p         | 0.01 | 0.10 | 1.23 | 4 | 1.04 | 1.13 | 0.93 | 1.00 | 0.96 |
| Q15063   | Periostin OS=          | 0.00 | 0.04 | 1.76 | 4 | 1.02 | 1.52 | 0.86 | 1.14 | 0.92 |
| Q15233   | Non-POU dor            | 0.00 | 0.03 | 1.21 | 4 | 0.94 | 1.02 | 0.87 | 1.00 | 0.85 |
| Q15582   | Transforming           | 0.00 | 0.02 | 1.80 | 4 | 1.05 | 1.46 | 0.81 | 1.08 | 0.93 |
| Q15650   | Activating sig         | 0.05 | 0.19 | 1.21 | 4 | 1.08 | 1.20 | 0.99 | 1.08 | 1.07 |
| Q15831   | Serine/threor          | 0.00 | 0.01 | 1.33 | 4 | 0.97 | 1.21 | 0.92 | 1.02 | 0.96 |
| Q15836   | Vesicle-assoc          | 0.04 | 0.17 | 1.27 | 4 | 1.00 | 1.23 | 0.97 | 1.03 | 1.04 |
| Q562R1   | Beta-actin-lik         | 0.00 | 0.01 | 1.25 | 4 | 0.94 | 1.17 | 0.98 | 1.18 | 0.98 |
| Q58FF7   | Putative heat          | 0.01 | 0.09 | 1.31 | 4 | 1.05 | 1.18 | 0.92 | 1.01 | 0.90 |
| Q5J8M3   | ER membran             | 0.02 | 0.13 | 1.22 | 4 | 0.94 | 1.05 | 0.92 | 1.00 | 0.87 |
| Q5SQN1-1 | Synaptosoma            | 0.00 | 0.04 | 1.23 | 4 | 1.00 | 1.15 | 0.96 | 1.05 | 0.93 |
| Q5VSG8-1 | Glycoprotein           | 0.02 | 0.10 | 1.29 | 4 | 1.08 | 1.16 | 0.94 | 1.09 | 0.90 |
| Q66GS9   | Centrosomal            | 0.00 | 0.04 | 1.25 | 4 | 0.92 | 1.08 | 0.90 | 0.97 | 0.87 |
| Q68CL5-5 | Isoform 5 of $\gamma$  | 0.00 | 0.02 | 1.51 | 4 | 0.99 | 1.27 | 0.84 | 1.11 | 0.99 |
| Q69YQ0-1 | Cytospin-A [C          | 0.01 | 0.10 | 1.23 | 4 | 1.00 | 1.12 | 0.91 | 1.00 | 0.92 |
| Q6NUN9   | Zinc finger pr         | 0.02 | 0.11 | 1.36 | 4 | 1.01 | 1.25 | 0.92 | 1.03 | 0.99 |
| Q7L3T8   | probable prol          | 0.00 | 0.03 | 1.24 | 4 | 1.00 | 1.12 | 0.90 | 1.01 | 0.94 |
| Q7Z6J8   | E3 ubiquitin- $\gamma$ | 0.00 | 0.04 | 1.40 | 4 | 0.96 | 1.23 | 0.92 | 1.07 | 0.88 |
| Q86UD1   | Out at first pr        | 0.03 | 0.14 | 1.37 | 4 | 1.00 | 1.29 | 0.94 | 0.96 | 1.04 |
| Q8IWA4   | Mitofusin-1 C          | 0.00 | 0.01 | 1.22 | 4 | 1.02 | 1.19 | 0.98 | 1.13 | 1.00 |
| Q8NCD3   | Holliday junct         | 0.00 | 0.03 | 1.44 | 4 | 0.92 | 1.22 | 0.87 | 1.04 | 0.84 |
| Q8NFI3   | Cytosolic end          | 0.00 | 0.03 | 1.24 | 4 | 0.98 | 1.22 | 0.99 | 1.05 | 1.01 |
| Q8NFP9   | Neurobeachin           | 0.04 | 0.18 | 1.26 | 4 | 1.04 | 1.22 | 1.00 | 1.05 | 0.97 |
| Q8WVD5-1 | RING finger p          | 0.03 | 0.15 | 1.28 | 4 | 1.07 | 1.29 | 1.01 | 1.21 | 1.06 |
| Q8WVIO   | Small integra          | 0.02 | 0.11 | 1.34 | 4 | 0.98 | 1.23 | 0.92 | 1.10 | 1.10 |
| Q8WVQ1   | Soluble calci          | 0.02 | 0.12 | 1.27 | 4 | 1.05 | 1.22 | 0.96 | 1.10 | 1.00 |
| Q8WXX5   | dnaJ homolo $\gamma$   | 0.02 | 0.10 | 1.21 | 4 | 1.00 | 1.10 | 0.91 | 1.03 | 0.99 |
| Q8WYA0   | Intraflagellar         | 0.01 | 0.07 | 1.29 | 4 | 1.01 | 1.24 | 0.96 | 1.07 | 0.97 |
| Q8WYQ5-1 | Microprocess           | 0.01 | 0.09 | 1.21 | 4 | 0.99 | 1.12 | 0.93 | 1.06 | 0.92 |
| Q92734-1 | Protein TFG [          | 0.00 | 0.03 | 1.25 | 4 | 0.94 | 1.11 | 0.89 | 1.04 | 0.93 |
| Q92997   | segment pola           | 0.00 | 0.02 | 1.40 | 4 | 0.98 | 1.21 | 0.87 | 1.04 | 0.90 |
| Q96CN9   | GRIP and coil          | 0.01 | 0.09 | 1.29 | 4 | 0.94 | 1.07 | 0.91 | 1.01 | 0.83 |
| Q96F63   | Coiled-coil dc         | 0.01 | 0.08 | 1.39 | 4 | 1.00 | 1.22 | 0.88 | 1.05 | 0.92 |
| Q96GQ5-1 | RUS1 family $\gamma$   | 0.02 | 0.11 | 1.23 | 4 | 0.96 | 1.13 | 0.94 | 0.99 | 0.92 |
| Q96HQ2-1 | CDKN2AIP N-            | 0.01 | 0.05 | 1.29 | 4 | 0.93 | 1.14 | 0.93 | 1.05 | 0.88 |
| Q96I51   | RCC1-like G e          | 0.00 | 0.01 | 1.24 | 4 | 0.96 | 1.06 | 0.89 | 0.95 | 0.86 |
| Q96IY1   | Kinetochore- $\gamma$  | 0.00 | 0.03 | 1.28 | 4 | 1.06 | 1.18 | 0.92 | 1.00 | 0.97 |
| Q96J42   | Thioredoxin c          | 0.03 | 0.14 | 1.25 | 4 | 0.92 | 1.09 | 0.88 | 1.04 | 0.88 |
| Q96R06   | Sperm-associ           | 0.01 | 0.09 | 1.28 | 4 | 1.03 | 1.17 | 0.91 | 1.02 | 0.96 |
| Q96SZ6   | CDK5 regulat           | 0.01 | 0.06 | 1.22 | 4 | 0.95 | 1.12 | 0.92 | 1.08 | 1.01 |
| Q99435-1 | Protein kinas          | 0.00 | 0.00 | 1.62 | 4 | 1.00 | 1.38 | 0.86 | 1.17 | 0.85 |
| Q99719   | Septin-5 OS=           | 0.00 | 0.02 | 1.72 | 4 | 1.00 | 1.40 | 0.81 | 1.04 | 0.88 |
| Q9BRJ6   | Uncharacteri           | 0.05 | 0.19 | 1.24 | 4 | 0.90 | 1.02 | 0.88 | 0.90 | 0.83 |
| Q9BVV7   | Mitochondria           | 0.05 | 0.19 | 1.31 | 4 | 1.00 | 1.24 | 0.95 | 1.05 | 1.02 |
| Q9BW72   | HIG1 domain            | 0.00 | 0.01 | 1.77 | 4 | 1.10 | 1.73 | 1.12 | 1.09 | 0.98 |
| Q9BZP6   | Acidic mamm            | 0.04 | 0.17 | 1.43 | 4 | 1.04 | 1.11 | 0.77 | 0.95 | 0.81 |
| Q9H4B7   | tubulin beta- $\gamma$ | 0.01 | 0.06 | 1.50 | 4 | 0.93 | 1.36 | 0.90 | 1.16 | 1.01 |
| Q9HC07   | Transmembr             | 0.00 | 0.01 | 1.25 | 4 | 1.00 | 1.24 | 0.99 | 1.17 | 1.09 |
| Q9NP58   | ATP-binding c          | 0.03 | 0.16 | 1.26 | 4 | 1.04 | 1.22 | 0.97 | 1.05 | 0.97 |
| Q9NQ89   | protein C12o           | 0.02 | 0.12 | 1.22 | 4 | 0.94 | 1.15 | 0.95 | 1.06 | 1.03 |
| Q9NS73   | MAP3K12-bir            | 0.03 | 0.14 | 1.23 | 4 | 1.06 | 1.24 | 1.02 | 1.00 | 1.08 |
| Q9NW81   | ATP synthase           | 0.01 | 0.07 | 1.26 | 4 | 0.93 | 1.15 | 0.92 | 0.95 | 0.92 |

|          |                  |      |      |      |   |      |      |      |      |      |
|----------|------------------|------|------|------|---|------|------|------|------|------|
| Q9NXX8   | F-box/LRR-rep    | 0.03 | 0.15 | 1.24 | 4 | 1.09 | 1.26 | 1.02 | 1.11 | 1.06 |
| Q9NYF8-1 | Bcl-2-associated | 0.00 | 0.03 | 1.21 | 4 | 0.99 | 1.12 | 0.93 | 1.07 | 0.94 |
| Q9NYF8-3 | Isoform 3 of t   | 0.05 | 0.19 | 1.25 | 4 | 0.89 | 1.03 | 0.85 | 0.94 | 0.83 |
| Q9NZI7   | Upstream-bir     | 0.02 | 0.11 | 1.25 | 4 | 0.98 | 1.15 | 0.92 | 1.04 | 1.00 |
| Q9NZJ4-1 | Sacsin [OS=H     | 0.05 | 0.19 | 1.26 | 4 | 1.05 | 1.22 | 0.97 | 1.07 | 1.04 |
| Q9NZZ3   | Charged mult     | 0.00 | 0.04 | 1.24 | 4 | 1.01 | 1.12 | 0.91 | 1.01 | 0.95 |
| Q9P003   | Protein corni    | 0.01 | 0.08 | 1.27 | 4 | 1.05 | 1.25 | 0.99 | 1.09 | 1.07 |
| Q9P2J9   | [Pyruvate del    | 0.05 | 0.19 | 1.33 | 4 | 0.91 | 1.21 | 1.02 | 1.05 | 0.96 |
| Q9P2L0-1 | WD repeat-cc     | 0.00 | 0.02 | 1.23 | 4 | 0.97 | 1.13 | 0.92 | 1.07 | 0.93 |
| Q9UFC0   | Leucine-rich r   | 0.00 | 0.03 | 1.32 | 4 | 0.97 | 1.16 | 0.92 | 1.01 | 0.88 |
| Q9UFG5   | UPF0449 pro      | 0.01 | 0.09 | 1.56 | 4 | 0.92 | 1.39 | 0.89 | 1.19 | 0.91 |
| Q9UJA3   | DNA helicase     | 0.03 | 0.14 | 1.49 | 4 | 1.04 | 1.32 | 0.89 | 1.17 | 0.99 |
| Q9UK97   | F-box only pr    | 0.02 | 0.10 | 1.24 | 4 | 1.02 | 1.24 | 1.00 | 1.20 | 1.02 |
| Q9UK99   | F-box only pr    | 0.00 | 0.03 | 1.51 | 4 | 0.95 | 1.28 | 0.87 | 1.09 | 0.85 |
| Q9UQL6-3 | Isoform 3 of t   | 0.04 | 0.17 | 1.26 | 4 | 0.98 | 1.23 | 0.99 | 1.02 | 1.03 |
| Q9Y2G8   | DnaJ homolo      | 0.04 | 0.18 | 1.46 | 4 | 0.95 | 1.21 | 0.88 | 1.01 | 0.83 |
| Q9Y2W1   | Thyroid horm     | 0.00 | 0.03 | 1.26 | 4 | 0.98 | 1.12 | 0.89 | 1.02 | 0.97 |
| Q9Y2W6   | tudor and KH     | 0.04 | 0.17 | 1.20 | 4 | 1.03 | 1.20 | 1.02 | 1.09 | 0.99 |
| Q9Y3D0   | Mitotic spind    | 0.02 | 0.12 | 1.28 | 4 | 1.01 | 1.15 | 0.95 | 1.08 | 0.90 |
| Q9Y3D8   | Adenylate kir    | 0.04 | 0.16 | 1.30 | 4 | 0.96 | 1.24 | 1.00 | 1.03 | 1.01 |
| Q9Y605   | MORF4 famil      | 0.01 | 0.10 | 1.25 | 4 | 0.92 | 1.15 | 0.92 | 1.03 | 0.93 |
