# Supplementary material for: Amyloid-beta peptide neurotoxicity in human neuronal cells is associated with modulation of insulin-like growth factor transport, lysosomal machinery and extracellular matrix receptor interactions
Source: PubMed Central journal article supplement — Neural Regen Res. 2020 May 11;15(11):2131–42. doi: 10.4103/1673-5374.282261 (PMC7716038; doi:10.4103/1673-5374.282261), 2020-05-11
Supplement: NRR-15-2131_Suppl4.pdf [file NRR-15-2131_Suppl4.pdf]

|                                     |                                             | Protein names                                         | Gene names | Fold Changes |
|-------------------------------------|---------------------------------------------|-------------------------------------------------------|------------|--------------|
| Exocytosis                          |                                             | Plasminogen                                           | PLG        | 1.53         |
|                                     |                                             | Septin-5                                              | SEPT5      | 1.41         |
|                                     |                                             | Fibronectin                                           | FN1        | 1.34         |
|                                     |                                             | Sialidase-1                                           | NEU1       | 1.34         |
|                                     |                                             | Coagulation factor V                                  | F5         | 1.34         |
|                                     |                                             | Ras-related protein Rab-8B                            | RAB8B      | 1.24         |
|                                     |                                             | SPARC                                                 | SPARC      | 1.23         |
|                                     |                                             | Arylsulfatase B                                       | ARSB       | 0.83         |
|                                     |                                             | Acid ceramidase                                       | ASAHI      | 0.82         |
|                                     |                                             | Alpha-galactosidase A                                 | GLA        | 0.82         |
|                                     |                                             | Myosin-10                                             | MYH10      | 0.81         |
|                                     |                                             | Cathepsin D                                           | CTSD       | 0.79         |
|                                     |                                             | Serpine B6                                            | SERPINEB6  | 0.79         |
|                                     |                                             | Cathepsin B                                           | CTSB       | 0.78         |
|                                     |                                             | Lysosomal alpha-glucosidase                           | GAA        | 0.78         |
|                                     |                                             | Ras-related protein Rap-1A                            | RAP1A      | 0.76         |
|                                     |                                             | Lysosome-associated membrane glycoprotein 2           | LAMP2      | 0.74         |
|                                     |                                             | Leukocyte elastase inhibitor                          | SERPINEB1  | 0.73         |
|                                     |                                             | Peroxiredoxin-4                                       | PRDX4      | 0.67         |
|                                     |                                             | Ganglioside GM2 activator                             | GM2A       | 0.58         |
|                                     | NPC intracellular cholesterol transporter 2 | NPC2                                                  | 0.51       |              |
| Regulation of proteolysis           |                                             | Complement component C8 beta chain                    | C8B        | 1.64         |
|                                     |                                             | Complement component C9                               | C9         | 1.62         |
|                                     |                                             | Pregnancy zone protein                                | PZP        | 1.59         |
|                                     |                                             | Complement component C7                               | C7         | 1.58         |
|                                     |                                             | Prothrombin                                           | F2         | 1.53         |
|                                     |                                             | Inter-alpha-trypsin inhibitor heavy chain H2          | ITI2       | 1.52         |
|                                     |                                             | Regucalcin                                            | RGN        | 1.50         |
|                                     |                                             | Heparin cofactor 2                                    | SERPINE1   | 1.49         |
|                                     |                                             | Vitronectin                                           | VTN        | 1.47         |
|                                     |                                             | Carboxypeptidase N catalytic chain                    | CPN1       | 1.42         |
|                                     |                                             | Fibronectin                                           | FN1        | 1.34         |
|                                     |                                             | Collagen alpha-3                                      | COL6A3     | 1.28         |
|                                     |                                             | Sortilin-related receptor                             | SORL1      | 1.27         |
|                                     |                                             | Regulator complex protein LAMTOR5                     | LAMTOR5    | 1.25         |
|                                     |                                             | Small ubiquitin-related modifier 2                    | SUMO2      | 0.81         |
|                                     |                                             | Serpine B6                                            | SERPINEB6  | 0.79         |
|                                     |                                             | Cathepsin B                                           | CTSB       | 0.78         |
|                                     | Leukocyte elastase inhibitor                | SERPINEB1                                             | 0.73       |              |
| Regulation of complement activation |                                             | Complement component C8 beta chain                    | C8B        | 1.64         |
|                                     |                                             | Complement component C9                               | C9         | 1.62         |
|                                     |                                             | Complement component C7                               | C7         | 1.58         |
|                                     |                                             | Prothrombin                                           | F2         | 1.53         |
|                                     |                                             | Vitronectin                                           | VTN        | 1.47         |
|                                     |                                             | Carboxypeptidase N catalytic chain                    | CPN1       | 1.42         |
|                                     |                                             | Sialidase-1                                           | NEU1       | 1.34         |
| Neutrophil degranulation            |                                             | Arylsulfatase B                                       | ARSB       | 0.83         |
|                                     |                                             | Acid ceramidase                                       | ASAHI      | 0.82         |
|                                     |                                             | Alpha-galactosidase A                                 | GLA        | 0.82         |
|                                     |                                             | Cathepsin D                                           | CTSD       | 0.79         |
|                                     |                                             | Serpine B6                                            | SERPINEB6  | 0.79         |
|                                     |                                             | Cathepsin B                                           | CTSB       | 0.78         |
|                                     |                                             | Lysosomal alpha-glucosidase                           | GAA        | 0.78         |
|                                     |                                             | Ras-related protein Rap-1A                            | RAP1A      | 0.76         |
|                                     |                                             | Lysosome-associated membrane glycoprotein 2           | LAMP2      | 0.74         |
|                                     |                                             | Leukocyte elastase inhibitor                          | SERPINEB1  | 0.73         |
|                                     |                                             | Peroxiredoxin-4                                       | PRDX4      | 0.67         |
|                                     | Ganglioside GM2 activator                   | GM2A                                                  | 0.58       |              |
|                                     | NPC intracellular cholesterol transporter 2 | NPC2                                                  | 0.51       |              |
| Lysosome                            |                                             | Sialidase-1                                           | NEU1       | 1.34         |
|                                     |                                             | Clathrin heavy chain 2                                | CLTCL1     | 1.31         |
|                                     |                                             | Arylsulfatase B                                       | ARSB       | 0.83         |
|                                     |                                             | Acid ceramidase                                       | ASAHI      | 0.82         |
|                                     |                                             | Alpha-galactosidase A                                 | GLA        | 0.82         |
|                                     |                                             | Cathepsin D                                           | CTSD       | 0.79         |
|                                     |                                             | Cathepsin B                                           | CTSB       | 0.78         |
|                                     |                                             | Lysosomal alpha-glucosidase                           | GAA        | 0.78         |
|                                     |                                             | Lysosome-associated membrane glycoprotein 2           | LAMP2      | 0.74         |
|                                     |                                             | Ganglioside GM2 activator                             | GM2A       | 0.58         |
|                                     |                                             | NPC intracellular cholesterol transporter 2           | NPC2       | 0.51         |
| Complement and coagulation cascades |                                             | Complement component C8 beta chain                    | C8B        | 1.64         |
|                                     |                                             | Complement component C9                               | C9         | 1.62         |
|                                     |                                             | Complement component C7                               | C7         | 1.58         |
|                                     |                                             | Prothrombin                                           | F2         | 1.53         |
|                                     |                                             | Plasminogen                                           | PLG        | 1.53         |
|                                     |                                             | Heparin cofactor 2                                    | SERPINE1   | 1.49         |
|                                     |                                             | Vitronectin                                           | VTN        | 1.47         |
|                                     |                                             | Coagulation factor V                                  | F5         | 1.34         |
|                                     |                                             | Prothrombin                                           | F2         | 1.53         |
|                                     |                                             | Plasminogen                                           | PLG        | 1.53         |
| IGF transport and uptake by IGF-BPs |                                             | Alpha-fetoprotein                                     | AFP        | 1.52         |
|                                     |                                             | Inter-alpha-trypsin inhibitor heavy chain H2          | ITI2       | 1.52         |
|                                     |                                             | Heparin cofactor 2                                    | SERPINE1   | 1.49         |
|                                     |                                             | Apolipoprotein B-100                                  | APOB       | 1.46         |
|                                     |                                             | Coagulation factor V                                  | F5         | 1.34         |
|                                     |                                             | Prothrombin                                           | F2         | 1.53         |
| ECM proteoglycans                   |                                             | Cartilage oligomeric matrix protein                   | COMP       | 1.53         |
|                                     |                                             | Fibromodulin                                          | FMOD       | 1.52         |
|                                     |                                             | Vitronectin                                           | VTN        | 1.47         |
|                                     |                                             | Collagen alpha-3                                      | COL6A3     | 1.28         |
|                                     | SPARC                                       | SPARC                                                 | 1.23       |              |
| Amyloid fiber formation             |                                             | Transforming growth factor-beta-induced protein 1q-h3 | TGFB1      | 1.40         |
|                                     |                                             | Histone H2B type 1-K                                  | HIST1H2BK  | 1.33         |
|                                     |                                             | Histone H2AX                                          | H2AFX      | 1.30         |
|                                     |                                             | Histone H2A.Z                                         | H2AFZ      | 1.28         |
|                                     |                                             | Sortilin-related receptor                             | SORL1      | 1.27         |
| Oxidative Stress Induced Senescence |                                             | Histone H2B type 1-K                                  | HIST1H2BK  | 1.33         |
|                                     |                                             | E3 ubiquitin-protein ligase RING1                     | RING1      | 1.30         |
|                                     |                                             | Histone H2AX                                          | H2AFX      | 1.30         |
|                                     |                                             | Histone H2A.Z                                         | H2AFZ      | 1.28         |
|                                     |                                             | Thioredoxin                                           | TXN        | 0.62         |
| Collagen degradation                |                                             | Collagen alpha-1                                      | COL10A1    | 1.29         |
|                                     |                                             | Collagen alpha-3                                      | COL6A3     | 1.28         |
|                                     |                                             | Cathepsin D                                           | CTSD       | 0.79         |
|                                     |                                             | Cathepsin B                                           | CTSB       | 0.78         |
| Signaling by PDGF                   |                                             | Thrombospondin-4                                      | THBS4      | 1.43         |
|                                     |                                             | Plasminogen                                           | PLG        | 1.53         |
|                                     |                                             | GTPase KRas                                           | KRAS       | 0.82         |
|                                     |                                             | Collagen alpha-3                                      | COL6A3     | 1.28         |
| Innate Immune System                |                                             | Complement component C8 beta chain                    | C8B        | 1.64         |
|                                     |                                             | Complement component C9                               | C9         | 1.62         |
|                                     |                                             | Complement component C7                               | C7         | 1.58         |
|                                     |                                             | Prothrombin                                           | F2         | 1.53         |
|                                     |                                             | Vitronectin                                           | VTN        | 1.47         |
|                                     |                                             | Apolipoprotein B-100                                  | APOB       | 1.46         |
|                                     |                                             | Carboxypeptidase N catalytic chain                    | CPN1       | 1.42         |
|                                     |                                             | Sialidase-1                                           | NEU1       | 1.34         |
|                                     |                                             | PDZ domain-containing protein 11                      | PDZD11     | 1.20         |
|                                     |                                             | Arylsulfatase B                                       | ARSB       | 0.83         |
|                                     |                                             | GTPase KRas                                           | KRAS       | 0.82         |
|                                     |                                             | Acid ceramidase                                       | ASAHI      | 0.82         |
|                                     |                                             | Alpha-galactosidase A                                 | GLA        | 0.82         |
|                                     |                                             | Cathepsin D                                           | CTSD       | 0.79         |
|                                     |                                             | Serpine B6                                            | SERPINEB6  | 0.79         |
|                                     |                                             | Cathepsin B                                           | CTSB       | 0.78         |
|                                     |                                             | Lysosomal alpha-glucosidase                           | GAA        | 0.78         |
|                                     | Ras-related protein Rap-1A                  | RAP1A                                                 | 0.76       |              |
|                                     | Lysosome-associated membrane glycoprotein 2 | LAMP2                                                 | 0.74       |              |
|                                     | Leukocyte elastase inhibitor                | SERPINEB1                                             | 0.73       |              |
|                                     | Copper transport protein ATOX1              | ATOX1                                                 | 0.72       |              |
|                                     | Peroxiredoxin-4                             | PRDX4                                                 | 0.67       |              |

T1 (8µm\_6h) vs. Ctrl

|                                                         |                                              |                                                  |          |      |
|---------------------------------------------------------|----------------------------------------------|--------------------------------------------------|----------|------|
|                                                         |                                              | Thioredoxin                                      | TXN      | 0.62 |
|                                                         |                                              | Ganglioside GM2 activator                        | GM2A     | 0.58 |
|                                                         |                                              | NPC intracellular cholesterol transporter 2      | NPC2     | 0.51 |
|                                                         | <b>neutrophil mediated immunity</b>          | Prothrombin                                      | F2       | 1.53 |
|                                                         |                                              | Sialidase-1                                      | NEU1     | 1.34 |
|                                                         |                                              | Arylsulfatase B                                  | ARSB     | 0.83 |
|                                                         |                                              | Acid ceramidase                                  | ASAH1    | 0.82 |
|                                                         |                                              | Alpha-galactosidase A                            | GLA      | 0.82 |
|                                                         |                                              | Cathepsin D                                      | CTSD     | 0.79 |
|                                                         |                                              | Serpin B6                                        | SERPINB6 | 0.79 |
|                                                         |                                              | Cathepsin B                                      | CTSB     | 0.78 |
|                                                         |                                              | Lysosomal alpha-glucosidase                      | GAA      | 0.78 |
|                                                         |                                              | Ras-related protein Rap-1A                       | RAP1A    | 0.76 |
|                                                         |                                              | Lysosome-associated membrane glycoprotein 2      | LAMP2    | 0.74 |
|                                                         |                                              | Leukocyte elastase inhibitor                     | SERPINB1 | 0.73 |
|                                                         |                                              | Peroxiredoxin-4                                  | PRDX4    | 0.67 |
|                                                         |                                              | Ganglioside GM2 activator                        | GM2A     | 0.58 |
|                                                         |                                              | NPC intracellular cholesterol transporter 2      | NPC2     | 0.51 |
| <b>T2 (8um_24h) vs. Ctrl</b>                            | <b>Exocytosis</b>                            | Fatty acid-binding protein 5                     | FABP5    | 1.22 |
|                                                         |                                              | Superoxide dismutase [Cu-Zn]                     | SOD1     | 0.82 |
|                                                         |                                              | Lysosomal protective protein                     | CTSA     | 0.77 |
|                                                         |                                              | Ganglioside GM2 activator                        | GM2A     | 0.77 |
|                                                         |                                              | Thrombospondin-1                                 | THBS1    | 0.77 |
|                                                         | Alpha-2-HS-glycoprotein                      | AHSG                                             | 0.69     |      |
|                                                         | Lactotransferrin                             | LTF                                              | 0.65     |      |
|                                                         | <b>Regulation of proteolysis</b>             | Tumor necrosis factor alpha-induced protein 8    | TNFAIP8  | 2.22 |
|                                                         |                                              | Transcription initiation factor TFIIID subunit 1 | TAF1     | 1.32 |
|                                                         |                                              | Antithrombin-III                                 | SERPINC1 | 0.81 |
|                                                         |                                              | Inter-alpha-trypsin inhibitor heavy chain H2     | ITIH2    | 0.79 |
|                                                         |                                              | Thrombospondin-1                                 | THBS1    | 0.77 |
|                                                         | Alpha-2-HS-glycoprotein                      | AHSG                                             | 0.69     |      |
|                                                         | Lactotransferrin                             | LTF                                              | 0.65     |      |
|                                                         | Complement factor I                          | CFI                                              | 0.65     |      |
| E3 ubiquitin-protein ligase RBX1                        | RBX1                                         | 0.59                                             |          |      |
| <b>Immune system process</b>                            | Fatty acid-binding protein 5                 | FABP5                                            | 1.22     |      |
|                                                         | Superoxide dismutase [Cu-Zn]                 | SOD1                                             | 0.82     |      |
|                                                         | Collagen alpha-2                             | COL1A2                                           | 0.81     |      |
|                                                         | Antithrombin-III                             | SERPINC1                                         | 0.81     |      |
|                                                         | Lysosomal protective protein                 | CTSA                                             | 0.77     |      |
|                                                         | Ganglioside GM2 activator                    | GM2A                                             | 0.77     |      |
|                                                         | Thrombospondin-1                             | THBS1                                            | 0.77     |      |
|                                                         | Acidic mammalian chitinase                   | CHIA                                             | 0.74     |      |
|                                                         | Collagen alpha-1                             | COL1A1                                           | 0.72     |      |
|                                                         | Alpha-2-HS-glycoprotein                      | AHSG                                             | 0.69     |      |
| Lactotransferrin                                        | LTF                                          | 0.65                                             |          |      |
| Complement factor I                                     | CFI                                          | 0.65                                             |          |      |
| <b>ECM-receptor interaction</b>                         | Collagen alpha-2                             | COL1A2                                           | 0.81     |      |
|                                                         | Thrombospondin-1                             | THBS1                                            | 0.77     |      |
|                                                         | Collagen alpha-1                             | COL1A1                                           | 0.72     |      |
| <b>Immune System</b>                                    | Fatty acid-binding protein 5                 | FABP5                                            | 1.22     |      |
|                                                         | Superoxide dismutase [Cu-Zn]                 | SOD1                                             | 0.82     |      |
|                                                         | Collagen alpha-2                             | COL1A2                                           | 0.81     |      |
|                                                         | Lysosomal protective protein                 | CTSA                                             | 0.77     |      |
|                                                         | Ganglioside GM2 activator                    | GM2A                                             | 0.77     |      |
|                                                         | Collagen alpha-1                             | COL1A1                                           | 0.72     |      |
|                                                         | Alpha-2-HS-glycoprotein                      | AHSG                                             | 0.69     |      |
| Lactotransferrin                                        | LTF                                          | 0.65                                             |          |      |
| Complement factor I                                     | CFI                                          | 0.65                                             |          |      |
| E3 ubiquitin-protein ligase RBX1                        | RBX1                                         | 0.59                                             |          |      |
| <b>Collagen degradation</b>                             | Collagen alpha-2                             | COL1A2                                           | 0.81     |      |
|                                                         | Collagen alpha-1                             | COL1A1                                           | 0.72     |      |
| <b>Regulation of IGF transport and uptake by IGFbps</b> | Alpha-2-HS-glycoprotein                      | AHSG                                             | 0.69     |      |
|                                                         | Inter-alpha-trypsin inhibitor heavy chain H2 | ITIH2                                            | 0.79     |      |
|                                                         | Antithrombin-III                             | SERPINC1                                         | 0.81     |      |
| <b>Innate Immune System</b>                             | Fatty acid-binding protein 5                 | FABP5                                            | 1.22     |      |
|                                                         | Lysosomal protective protein                 | CTSA                                             | 0.77     |      |
|                                                         | Ganglioside GM2 activator                    | GM2A                                             | 0.77     |      |
|                                                         | Alpha-2-HS-glycoprotein                      | AHSG                                             | 0.69     |      |
|                                                         | Lactotransferrin                             | LTF                                              | 0.65     |      |
| Complement factor I                                     | CFI                                          | 0.65                                             |          |      |
| <b>ECM proteoglycans</b>                                | Collagen alpha-2                             | COL1A2                                           | 0.81     |      |
|                                                         | Collagen alpha-1                             | COL1A1                                           | 0.72     |      |
